# Supplementary material for: Formation and trapping of the thermodynamically unfavoured inverted-hemicucurbit[6]uril
Source: Royal Society of Chemistry journal article supplement (doi:10.1039/c9cc04990h), 2019-01-01
Supplement: c9cc04990h1.pdf [file c9cc04990h1.pdf]

Supporting information

**Formation and Trapping of The Thermodynamically Unfavoured  
*inverted*-hemicucurbit[6]uril**

Elena Prigorchenko, Sandra Kaabel, Triin Narva, Anastassia Baškir, Maria Fomitšenko, Jasper Adamson, Ivar Järving, Kari Rissanen, Toomas Tamm, Riina Aav\*.

Contents

|                                                                                                                                        |     |
|----------------------------------------------------------------------------------------------------------------------------------------|-----|
| General information .....                                                                                                              | S3  |
| Synthesis of cycHCs.....                                                                                                               | S3  |
| General synthetic procedure for <b>1</b> and <b>2</b> from ( <i>R,S</i> )- <i>N,N'</i> -cyclohexa-1,2-diylurea: .....                  | S3  |
| Characterization of <i>cis</i> -cycHC[6] <b>2</b> .....                                                                                | S5  |
| Characterization of <i>i-cis</i> -cycHC[6] <b>1</b> .....                                                                              | S5  |
| HPLC analysis of cycHCs.....                                                                                                           | S6  |
| Quantitative analysis of cycHCs.....                                                                                                   | S7  |
| Synthetic procedure of inter-conversion of cycHCs.....                                                                                 | S7  |
| Synthesis of <i>N,N'</i> -dimethylcyclohexa-1,2-diylureas .....                                                                        | S8  |
| ( <i>R,S</i> )- <i>N,N'</i> -dimethylcyclohexa-1,2-diylurea <b>7</b> .....                                                             | S8  |
| ( <i>R*,R*</i> )- <i>N,N'</i> -dimethyl-cyclohexa-1,2-diylurea <b>8</b> .....                                                          | S8  |
| Solubility measurements.....                                                                                                           | S9  |
| NMR analysis .....                                                                                                                     | S10 |
| NMR identification of <i>inverted-cis</i> -cycHC[6] <b>1</b> .....                                                                     | S10 |
| <sup>1</sup> H and <sup>13</sup> C-NMR spectra of compounds <b>1</b> , <b>2</b> , <b>7</b> , <b>8</b> . .....                          | S15 |
| <sup>1</sup> H and <sup>13</sup> C-NMR spectra of <i>i-cis</i> -cycHC[6] <b>1</b> .....                                                | S15 |
| <sup>1</sup> H and <sup>13</sup> C-NMR spectra of <i>cis</i> -cycHC[6] <b>2</b> .....                                                  | S16 |
| <sup>1</sup> H and <sup>13</sup> C-NMR spectra of ( <i>R,S</i> )-( <i>N,N'</i> -dimethyl)-cyclohexa-1,2-diylurea <b>7</b> .....        | S17 |
| <sup>1</sup> H and <sup>13</sup> C-NMR spectra of rac. ( <i>R*,R*</i> )-( <i>N,N'</i> -dimethyl)-cyclohexa-1,2-diylurea <b>8</b> ..... | S18 |
| Crystallographic analysis of <i>inverted-cis</i> -cycHC[6] <b>1</b> .....                                                              | S19 |
| Computational studies .....                                                                                                            | S21 |
| General information.....                                                                                                               | S21 |
| Methylated <i>R,S,S,R</i> - and <i>R,S,R,S</i> -ordered dimers .....                                                                   | S21 |
| Macrocycles without and with chloride ion.....                                                                                         | S22 |
| Iminium intermediates .....                                                                                                            | S22 |

|                                                                                                            |     |
|------------------------------------------------------------------------------------------------------------|-----|
| Energies of studied compounds .....                                                                        | S24 |
| Optimized geometries of key compounds .....                                                                | S25 |
| <i>cis</i> -cycHC[6] <b>2</b> coordinates in angstroms .....                                               | S25 |
| <i>i-cis</i> -cycHC[6] <b>1</b> coordinates in angstroms.....                                              | S26 |
| Cl <sup>-</sup> @ <i>cis</i> -cycHC[6] Cl <sup>-</sup> @ <b>2</b> coordinates in angstroms .....           | S27 |
| Cl <sup>-</sup> @ <i>i-cis</i> -cycHC[6] Cl <sup>-</sup> @ <b>1</b> coordinates in angstroms .....         | S28 |
| <i>R,S,S,R</i> -ordered dimer <b>9</b> coordinates in angstroms .....                                      | S29 |
| <i>R,S,R,S</i> -ordered dimer <b>10</b> coordinates in angstroms .....                                     | S29 |
| Cl <sup>-</sup> @ <i>R,S,S,R</i> -ordered dimer Cl <sup>-</sup> @ <b>9</b> coordinates in angstroms .....  | S29 |
| Cl <sup>-</sup> @ <i>R,S,R,S</i> -ordered dimer Cl <sup>-</sup> @ <b>10</b> coordinates in angstroms ..... | S30 |
| HCl@ <i>cis</i> -cycHC[6] HCl@ <b>2</b> final coordinates in angstroms .....                               | S30 |
| HCl@ <i>i-cis</i> -cycHC[6] HCl@ <b>1 A</b> final coordinates in angstroms.....                            | S31 |
| HCl@ <i>i-cis</i> -cycHC[6] HCl@ <b>1 B</b> final coordinates in angstroms .....                           | S32 |
| HCl@ <i>i-cis</i> -cycHC[6] HCl@ <b>1 C</b> final coordinates in angstroms .....                           | S33 |
| Complexation .....                                                                                         | S35 |
| General information.....                                                                                   | S35 |
| Determination of the stoichiometry of the complexes.....                                                   | S35 |
| Determination of the association constants .....                                                           | S36 |
| <sup>1</sup> H-NMR titration of ( <i>R,R</i> )-cycHC[6] <b>6</b> with TFA .....                            | S43 |
| References .....                                                                                           | S43 |

## General information

Unless otherwise stated, all reagents were purchased from commercial suppliers and used as received. Solvents used for flash chromatography were reagent grade, which were dried and distilled prior to use according to standard procedures. (*R,S*)-*N,N'*-cyclohexa-1,2-diylurea **3** was synthesized starting from either *cis*-1,2-diaminocyclohexane or mixture of *cis*- and *trans*-1,2-diaminocyclohexane according to literature procedure<sup>1</sup>. Reactions under microwave were performed in CEM Discover<sup>®</sup> microwave reactor. Flash chromatography was run over Thomar CC Silica Gel 60 (0.04-0.063 mm) stationary phase. Infrared spectra were obtained on a Bruker Tensor 27 FT-IR spectrometer and are reported in wavenumbers. HPLC based reaction rate monitoring was performed on an Agilent 1200 Series HPLC system with a Kinetex C18 column (2.1x100 mm, 2.6  $\mu$ m) and UV-detection at 210 nm. Identification of reaction products and traces was performed by RP-HPLC-HRMS on an Agilent 6540 UHD Accurate-Mass Q-TOF LC/MS spectrometer with a Zorbax Eclipse Plus C18 column (2.1x150 mm, 1.8  $\mu$ m) and AJ-ESI ionization. 1D <sup>1</sup>H and <sup>13</sup>C-NMR spectra were acquired on a Bruker AvanceIII 400 MHz spectrometer or a Bruker Avance III 800 MHz. Chemical shifts were referenced to the chloroform residual solvent signal in <sup>13</sup>C 77,160 ppm and <sup>1</sup>H 7,260 ppm. Samples were vortexed on vortex mixer Scientific Industries, Inc Vortex-Genie 2. Sonication was performed on ultrasonic bath Bandelin Sonorex Digitec DT 52 H.

## Synthesis of cycHCs

General synthetic procedure for **1** and **2** from (*R,S*)-*N,N'*-cyclohexa-1,2-diylurea:

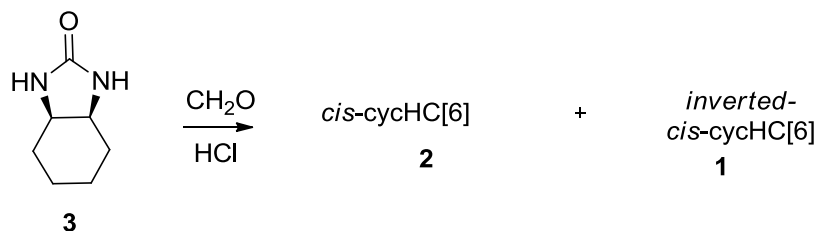

Suspension of (*R,S*)-*N,N'*-cyclohexa-1,2-diylurea **3** (prepared according to procedure in ref. 1) and paraformaldehyde was heated in aqueous HCl acid on oil bath. All reaction mixtures were heterogeneous, ratio of formed macrocycles **2** and **1** was determined from crude reaction mixture by HPLC-UV analysis (See SI section “Quantitative analysis of cycHCs”). Reaction mixture was filtered, washed with water and dried in open air. Crude product was dissolved from the filter with CH<sub>2</sub>Cl<sub>2</sub>, solvent evaporated and crude product was purified and macrocycles **1** and **2** were separated by flash chromatography on silica gel, gradient elution with 1-5% of *i*-PrOH in CH<sub>2</sub>Cl<sub>2</sub>.

**Table S1.** Reaction conditions and products of reactions that were performed according to general procedure, unless stated otherwise.

| reaction conditions |                    |                   |            |               |         | products     |            |             |                    |             |
|---------------------|--------------------|-------------------|------------|---------------|---------|--------------|------------|-------------|--------------------|-------------|
| N°                  | 3                  | paraformaldehyde  | 4M HCl     | reaction time | temp.   | Ratio of 1:2 | 1          | 2           | mixture of 1 and 2 | total       |
| 1                   | 318 mg, 2.27 mmol  | 71 mg, 2.4 mmol   | 9 mL       | 17h           | 70°C    | 1:1.2        | 76 mg, 22% | 137 mg, 40% | 23 mg, 7%          | 69%         |
| 2                   | 100 mg, 0.71 mmol  | 22 mg, 0.74 mmol  | 2.9 mL     | 18h           | 70°C    | 1:1.2        | 28 mg, 26% | 54 mg, 51%  |                    | 77%         |
| 3                   | 100 mg, 0.71 mmol  | 24 mg, 0.8 mmol   | 2.9 mL     | 4h            | 70°C    | 1.4:1        | 26 mg, 24% | 37 mg, 34%  | 10 mg, 9%          | 67%         |
| 4                   | 1000 mg, 7.13 mmol | 218 mg, 7.27 mmol | 29 mL      | 4h            | 70°C    | 1:1.4        |            |             |                    | 598 mg, 55% |
| 5                   | 200 mg, 1.43 mmol  | 43 mg, 1.43 mmol  | 5.7 mL     | 4h            | 70°C    | 1.4:1        | 71 mg, 33% | 68mg, 31%   | 28 mg, 13%         | 77%         |
| 6                   | 50 mg, 0.36 mmol   | 11 mg, 0.36 mmol  | 1.4 mL     | 3h 45min      | 110°C   | 1.1:1        |            |             |                    | 40 mg, 78%  |
| 7                   | 40 mg, 0.29mmol    | 9 mg, 0.29mmol    | 1 mL       | 1h 45 min     | MW 80°C | 1.2:1        |            |             |                    | 32 mg, 74%  |
| 8                   | 200 mg, 1.43 mmol  | 43 mg, 1.43 mmol  | 5.7 mL; 8M | 4h            | 70°C    | 1:3.3        | 34 mg, 16% | 131 mg, 60% | 18 mg, 8%          | 84%         |

<sup>a</sup>Standard deviation for measured ratios of **1** to **2** by Quantitative HPLC-UV analysis from the crude mixture is 1-11%

<sup>b</sup>No. 5 and No. 8 were performed in parallel in identical conditions, except for the molarity of aq. HCl solution, 4M and 8M.

### Characterization of *cis*-cycHC[6] **2**

NMR data was in agreement with literature data<sup>2</sup>

White solid

IR (KBr):  $\nu$ , (cm<sup>-1</sup>): 2933, 2854, 1708, 1437, 1377, 1361, 1268, 1245, 1211, 1182, 1145, 1121, 994, 964, 773, 702, 620, 565.

mp. 261 °C (dec).

### Characterization of *i-cis*-cycHC[6] **1**

NMR identification is in following section.

White solid

HRMS: C<sub>48</sub>H<sub>72</sub>N<sub>12</sub>O<sub>6</sub> calc.*m/z*: 913.5771 [M+H]<sup>+</sup>, 935.5590 [M+Na]<sup>+</sup>, exp.*m/z*: 913.5779 [M+H]<sup>+</sup>, 935.5599 [M+Na]<sup>+</sup>.

IR (KBr):  $\nu$ , (cm<sup>-1</sup>): 2934, 2858, 1706, 1437, 1361, 1270, 1243, 1210, 1183, 1145, 1120, 960, 774, 701, 621, 566.

mp. 290°C (dec).

## HPLC analysis of cycHCs

HPLC analysis of cycHCs was performed according to the previously developed method.<sup>3</sup>

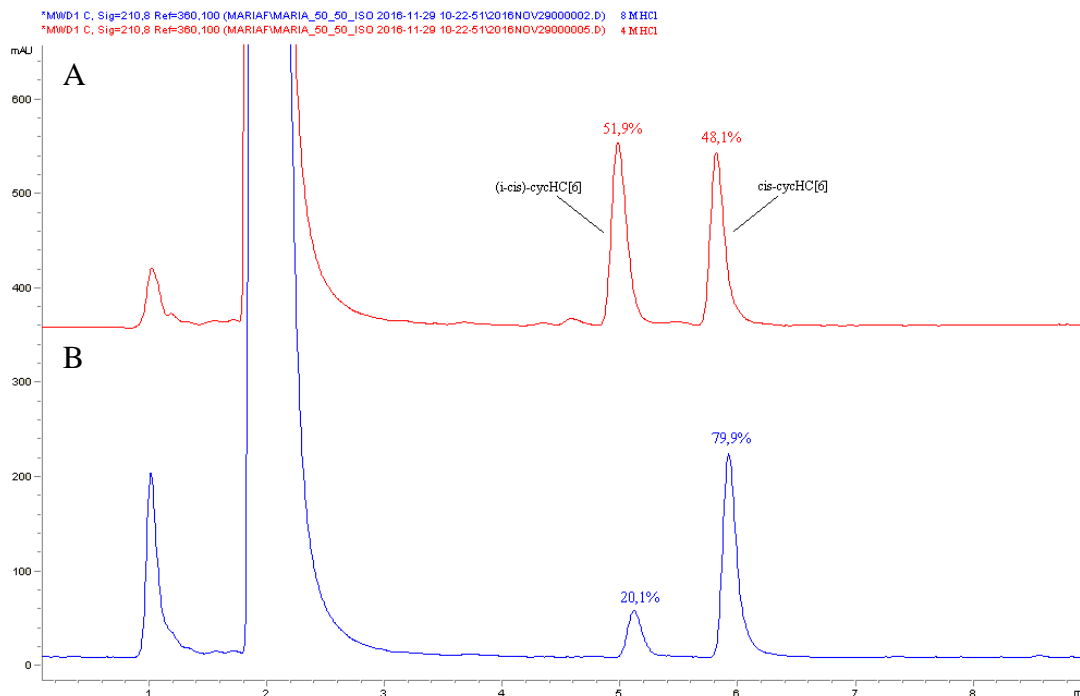

**Figure S1.** HPLC-UV chromatogram of crude reaction mixture performed in A) 4 M and B) 8 M HCl (see Table S1 row 5 and 8, and sample preparation details in next section).

The formation of *cis*-cycHC[8] starting from *cis*-cycHC[6] **2** was also investigated. cycHC **2** was subjected to following reaction conditions: mixture of formic acid and acetonitrile, mixture of acetic acid, acetonitrile and NaPF<sub>6</sub> and mixture of trifluoroacetic acid and acetonitrile, all at room temperature and analogously to our previous study for formation of (*R,R*)-cycHC[8]<sup>4</sup>. MS analysis of crude reaction mixtures confirmed formation of other homologues from *cis*-cycHC[6] (See Figure S2), but these compounds were formed in very low yield and therefore their isolation was not attempted.

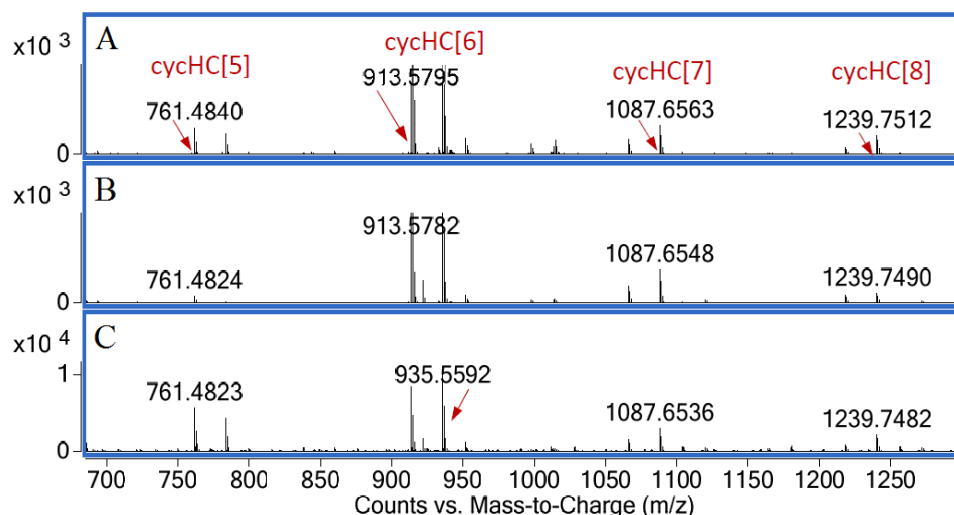

**Figure S2.** Mass-spectra of the trans-macrocyclisation reaction of *cis*-cycHC[6] **2** performed in A) mixture of formic acid and acetonitrile for 48 h, B) in mixture of NaPF<sub>6</sub> acetic acid and acetonitrile for 48 h and C) mixture of trifluoroacetic acid and acetonitrile for 1 h. The calculated m/z value for the [cycHC[5] + H]<sup>+</sup> is 761.4821; for the [cycHC[6] + H]<sup>+</sup> and [cycHC[6] + Na]<sup>+</sup> are 913.5771 and 935.5590, respectively; for the [cycHC[7] + Na]<sup>+</sup> is 1087.6540; for the [cycHC[8] + Na]<sup>+</sup> is 1239.7489.<sup>5</sup>

### Quantitative analysis of cycHCs

**Table S2.** Characteristic parameters for calibration of *i-cis*-cycHC[6] **1**.

|                                 | Equation                    | R      | LoD (µg/mL) | LoQ (µg/mL) |
|---------------------------------|-----------------------------|--------|-------------|-------------|
| <i>i-cis</i> -cycHC[6] <b>1</b> | $y=(10.1\pm 0.2)x+(5\pm 7)$ | 0.9951 | 0.057±0.002 | 0.188±0.008 |
| <i>cis</i> -cycHC[6] <b>2</b>   | $y=(10.6\pm 0.1)x+(1\pm 5)$ | 0.9980 | 0.111±0.004 | 0.37±0.02   |

For chromatographic analysis of crude reaction mixtures three parallels were taken (20 µl) as a suspension and diluted in CHCl<sub>3</sub>/CH<sub>3</sub>OH (1:4) mixture to reach fully dissolved sample. The concentrations were found using the equation  $y=ax+b$  equation from the calibration curve (Table S2).

### Synthetic procedure of inter-conversion of cycHCs

1. Heterogeneous mixture of *cis*-cycHC[6] **2** (10 mg, 0.01 mmol) in 4M aq. HCl (0.26 mL) was stirred for 3 h at 100 °C. Molar ratio of *i-cis*-cycHC[6] **1** to *cis*-cycHC[6] **2** in crude mixture was 1:19.3, respectively, determined by UV-HPLC (See "Quantitative analysis of cycHCs").
2. Heterogeneous mixture of *i-cis*-cycHC[6] **1** (10 mg, 0.01 mmol) in 4M aq. HCl (0.26 mL) was stirred for 3 h at 100 °C. Molar ratio of *i-cis*-cycHC[6] **1** to *cis*-cycHC[6] **2** in crude mixture was 1:1.3, respectively, determined by UV-HPLC (See "Quantitative analysis of cycHCs").

## Synthesis of *N,N'*-dimethylcyclohexa-1,2-diylureas

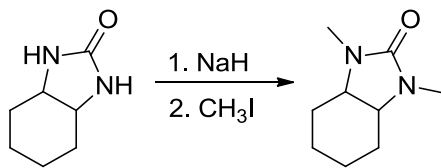

Synthesis was performed according to literature<sup>6</sup> as follows:

### *(R,S)*-*N,N'*-dimethylcyclohexa-1,2-diylurea **7**

Under argon atmosphere dioxane (7.2 mL) was added to *(R,S)*-*N,N'*-cyclohexa-1,2-diylurea **3** (102 mg, 0.728 mmol) and NaH (377 mg, 9.85 mmol, 60% in oil). Reaction mixture was heated 3 h at 55-60 °C and cooled to room temperature. Then methyl iodide (270  $\mu$ l, 4.34 mmol) was added and reaction was stirred at room temperature for 3 h. Reaction mixture was filtered, washed with CH<sub>2</sub>Cl<sub>2</sub>. Crude product was purified by flash chromatography on silica gel, gradient elution with 0-3% of *i*-PrOH in CH<sub>2</sub>Cl<sub>2</sub>. 74 mg of *(R,S)*-*N,N'*-dimethylcyclohexa-1,2-diylurea **7** as yellow oil was isolated in 60% yield.

HRMS: C<sub>9</sub>H<sub>16</sub>N<sub>2</sub>O calc.  $m/z$ : 169.1335 [M+H]<sup>+</sup>, 191.1155 [M+Na]<sup>+</sup>, exp.  $m/z$ : 169.1333 [M+H]<sup>+</sup>, 191.1154 [M+Na]<sup>+</sup>.

IR (neat):  $\nu$ , (cm<sup>-1</sup>): 2933, 2859, 1699, 1445, 1394, 1288, 1255, 1068, 1020, 993, 772, 695.

<sup>1</sup>H NMR (400 MHz, CDCl<sub>3</sub>)  $\delta$  (ppm) 3.30 – 3.27 (m, 2H), 2.71 (s, 6H), 1.78 – 1.66 (m, 2H), 1.63 – 1.53 (m, 2H), 1.53 – 1.41 (m, 2H), 1.37 – 1.25 (m, 2H).

<sup>13</sup>C NMR (101 MHz, CDCl<sub>3</sub>)  $\delta$  (ppm) 162.57, 55.34, 28.60, 25.38, 20.70.

### *(R\*,R\*)*-*N,N'*-dimethyl-cyclohexa-1,2-diylurea **8**

Under argon atmosphere dioxane (7.2 mL) was added to racemic *(R\*,R\*)*-*N,N'*-cyclohexa-1,2-diylurea **3** (102 mg, 0.728 mmol) and NaH (360 mg, 9.39 mmol, 60% in oil). Reaction mixture was heated 3 h at 55-60 °C and cooled to room temperature. Then methyl iodide (280  $\mu$ l, 4.5 mmol) was added and reaction was stirred at room temperature for 3.5h. Reaction mixture filtered, washed with CH<sub>2</sub>Cl<sub>2</sub>. Crude product purified by flash chromatography on silica gel, gradient elution with 0-3% of *i*-PrOH in CH<sub>2</sub>Cl<sub>2</sub>. 90 mg of racemic *(R\*,R\*)*-*N,N'*-dimethyl-cyclohexa-1,2-diylurea **8** as yellow oil was isolated in 74% yield.

HRMS: C<sub>9</sub>H<sub>16</sub>N<sub>2</sub>O calc.  $m/z$ : 169.1335 [M+H]<sup>+</sup>, 191.1155 [M+Na]<sup>+</sup>, exp.  $m/z$ : 169.1332 [M+H]<sup>+</sup>, 191.1151 [M+Na]<sup>+</sup>.

IR (neat):  $\nu$ , (cm<sup>-1</sup>): 2937, 2866, 1710, 1433, 1374, 1258, 1132, 1073, 1025, 921, 841, 772.

<sup>1</sup>H-NMR(400 MHz, CDCl<sub>3</sub>)  $\delta$  (ppm) 2.65 (s, 6H), 2.58 – 2.44 (m, 2H), 2.01 – 1.93 (m, 2H), 1.90 – 1.75 (m, 2H), 1.41 – 1.18 (m, 4H).

<sup>13</sup>C-NMR (101 MHz, CDCl<sub>3</sub>)  $\delta$  (ppm) 164.76, 63.90, 29.64, 28.18, 24.32.



## Solubility measurements

To ensure that equilibrium between *cis*- and *i-cis*-cycHC[6] is not influenced by difference in solubility in aqueous media we measured their solubility in pure water, 4M aq. HCl and 8M aq. HCl.

### Sample preparation

To 3 mg of macrocycle **1** or **2** (*i-cis*- or *cis*-cycHC[6]) 10 mL of solvent (pure water, 4M aq. HCl or 8M aq. HCl) were added. Resulted heterogeneous mixture was vortexed for 1 min and sonicated for 10 min at room temperature. Solid part was filtered and aqueous phase was evaporated in vacuum at 50°C. Solid residue obtained after aqueous solvent evaporation was transferred to vial with chloroform and organic solvent was evaporated. HPLC samples were prepared by addition of 100 µl of chloroform and 400 µl of methanol with Hamilton syringes to ensure exact volume. Amount of dissolved macrocycles in investigated solvents were found using calibration equations from Table S2.

In case of samples prepared in 4M and 8M aq. HCl partial decomposition of macrocycles to oligomers were observed in HPLC chromatogram (see Figure S3), which is consistent with proposed mechanism for cycHCs<sup>4</sup>.

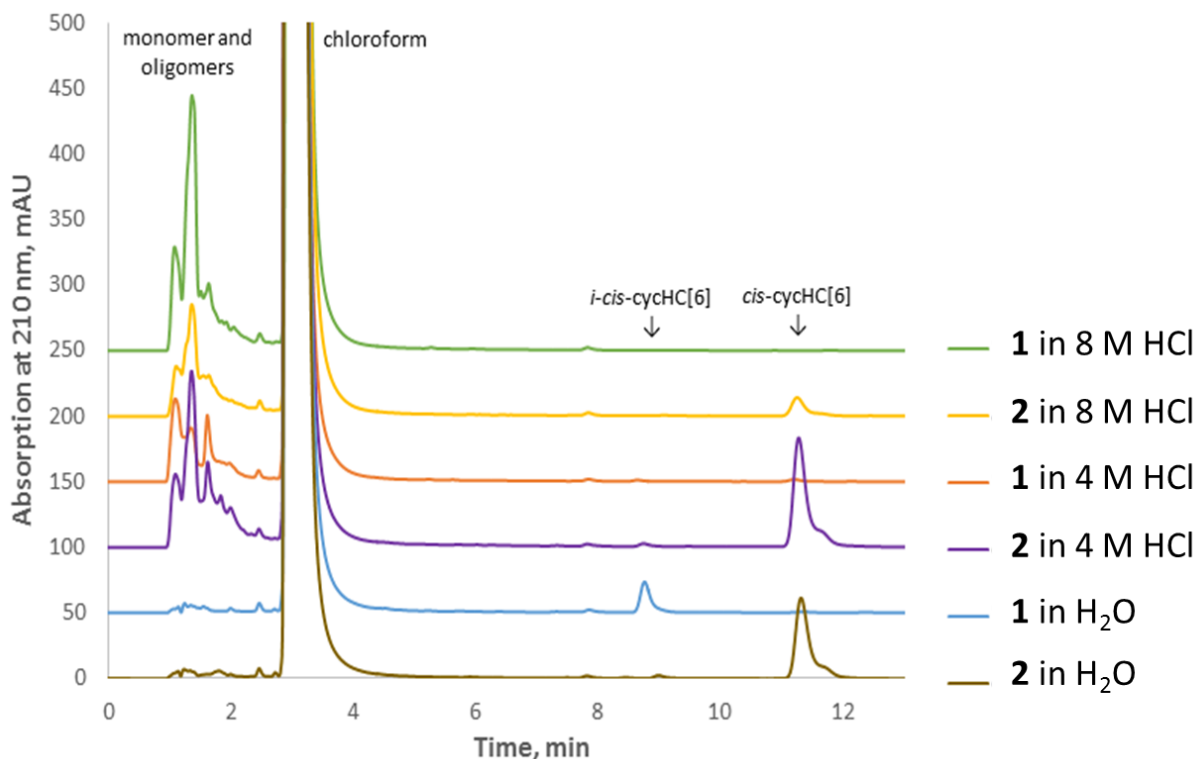

**Figure S3.** RP-HPLC chromatogram of **1** (*i-cis*-cycHC[6]) and **2** (*cis*-cycHC[6]) in pure water, 4M and 8M aq. HCl solution.

**Table S3.** Concentration of **1** and **2** obtained from solubility measurement.

| Solvent     | <i>cis</i> -cycHC[6]<br><b>2</b>   | <i>i-cis</i> -cycHC[6]<br><b>1</b> |
|-------------|------------------------------------|------------------------------------|
|             | $\mu\text{g/ml}$ ( $\mu\text{M}$ ) | $\mu\text{g/ml}$ ( $\mu\text{M}$ ) |
| Water       | 4.30 (4.71)                        | 1.41 (1.54)                        |
| 4 M aq. HCl | 5.35 (5.96)                        | 0.04 (0.04)                        |
| 8 M aq. HCl | 0.97 (1.06)                        | below LoD                          |

In acidic solutions of **1** and **2** due to formation of dynamic covalent library of linear and cyclic oligomers the exact solubility of macrocycles cannot be determined, nevertheless obtained results reflect that solubility of **1** and **2** is in micromolar range in aqueous media.

## NMR analysis

### NMR identification of *inverted-cis*-cycHC[6] **1**

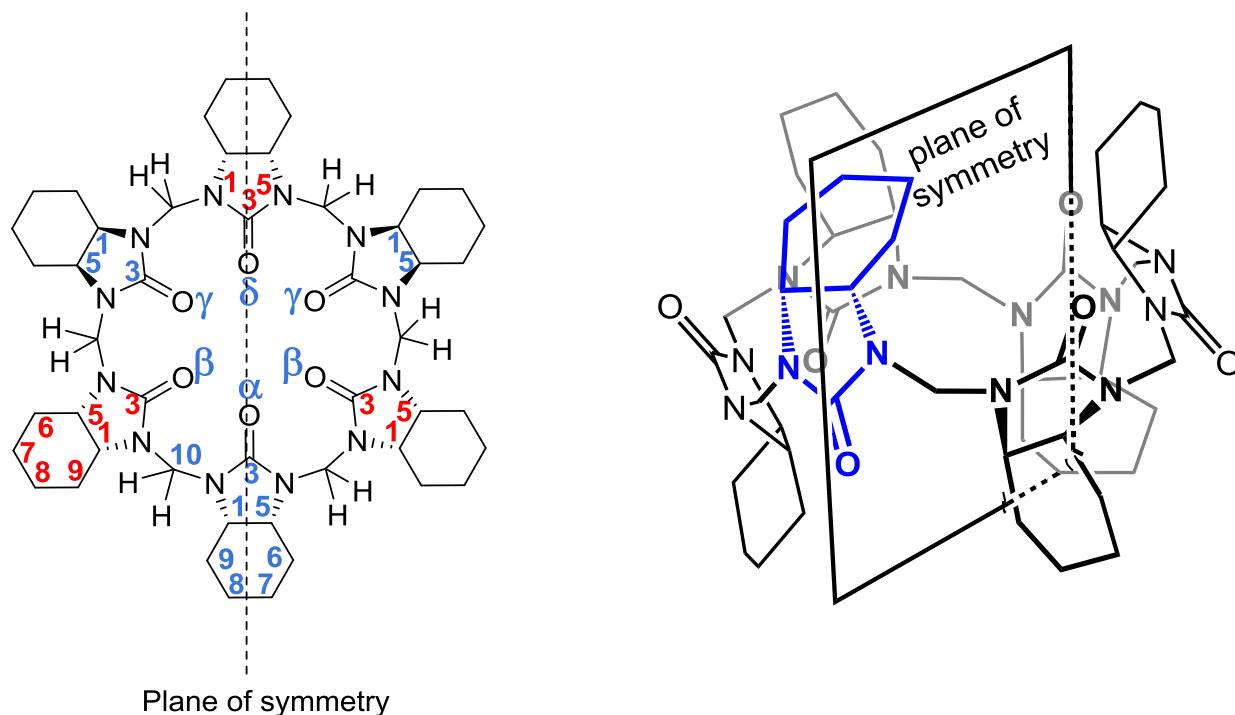

**Figure S4.** Structure of the *i-cis*-cycHC[6] **1** for NMR assignment.

*Inverted-cis*-cycHC[6] **1** has one plane of symmetry, which simplifies the analysis of its NMR spectra. As two halves of the molecule are equivalent, we will consider only 4 monomers ( $\alpha$ ,  $\beta$ ,  $\gamma$ ,  $\delta$ ), where  $\alpha$  denotes the inverted monomer. It is also important that monomers are in a zig-zag orientation and therefore numeration of the carbon atoms of the subsequent monomers alternates in each direction.

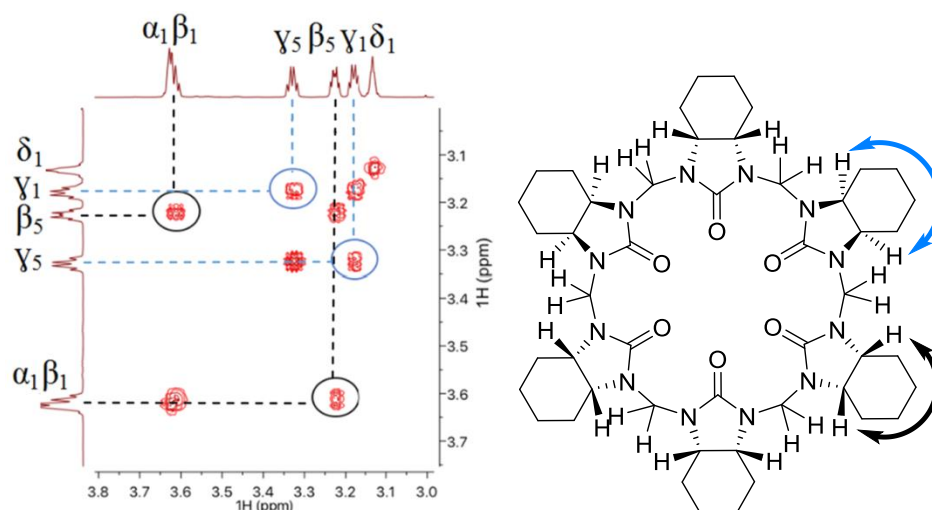

**Figure S5.** Part of a COSY spectrum, indicating neighbouring hydrogens, marked by arrows on the structure. The respective crosspeaks are indicated by circles in the figure.

The COSY spectrum in Fig. S5 indicates that  $\beta_1$  and  $\beta_5$  as well as  $\gamma_1$  and  $\gamma_5$  hydrogen atoms show a correlation cross peak and are therefore hydrogen atoms of the same monomer. These pairs of hydrogen atoms are marked with arrows and the respective cross peaks are circled in Fig. S5. The  $\alpha_1$  and  $\delta_1$  hydrogen atoms originate from symmetrical monomers and give only a single peak in the  $^1\text{H}$  NMR spectrum and therefore no cross peaks in the COSY spectrum.

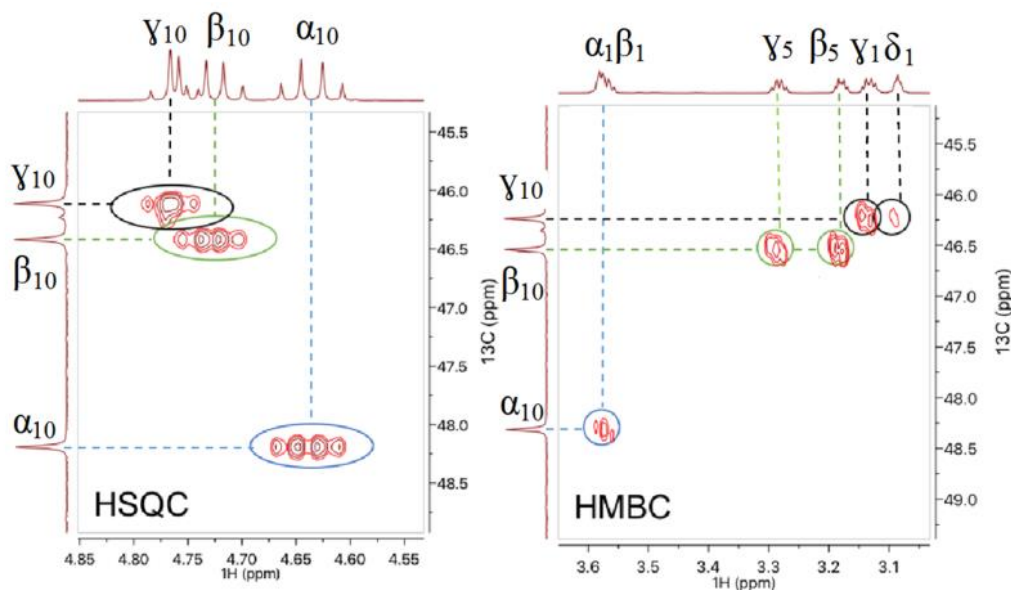

**Figure S6.** Parts of a HSQC and a HMBC spectra. The correlations in the spectrum are marked by arrows on the molecular structure.

The HSQC signals in Fig. S6 indicate correlations between  $\alpha_{10}$ ,  $\beta_{10}$  and  $\gamma_{10}$  bridge carbon atoms and the respective hydrogen atoms. Moreover, the HMBC spectrum in Fig. S6 shows that  $\alpha_1$  and  $\beta_1$  hydrogen atoms both give a correlation with  $\alpha_{10}$  bridge carbon atom and therefore must be next to the same bridge moiety in the macrocycle. From the earlier analysis of the COSY spectrum we know that the  $\alpha_1$  hydrogen atoms belong to a symmetrical monomer. We have denoted  $\alpha_1$  and  $\beta_1$  hydrogens and their correlation with  $\alpha_{10}$  carbon atoms with blue arrows in Fig. S6. The same logic applies to  $\delta_1$  and  $\gamma_1$  hydrogen atoms with these hydrogen atoms giving a correlation with  $\gamma_{10}$  bridge carbon atom, which is marked with black arrows; here  $\delta_1$  hydrogen atoms are from the symmetrical monomer. Furthermore,  $\beta_5$  and  $\gamma_5$  hydrogen atoms give a correlation in the HMBC spectrum with  $\beta_{10}$  bridge carbon atoms, which can be marked with green arrows in Fig. S6.

The NOESY spectrum in Fig. S7 indicates cross peaks between  $\delta_1$  and  $\gamma_1$  hydrogen atoms as well as between  $\delta_1$  and  $\beta_5$  hydrogen atoms, showing that all these hydrogen atoms point towards the cavity of the macrocycle. There is a cross peak between  $\gamma_5$  and  $\beta_5$  hydrogen atoms, demonstrating the same logic. These correlations map well with the positions of the hydrogen atoms in the crystal structure, also demonstrated in Fig. S7. No cross peaks are observed for  $\alpha_1$  hydrogen atoms, which confirms that these hydrogen atoms point away from the cavity of the macrocycle.

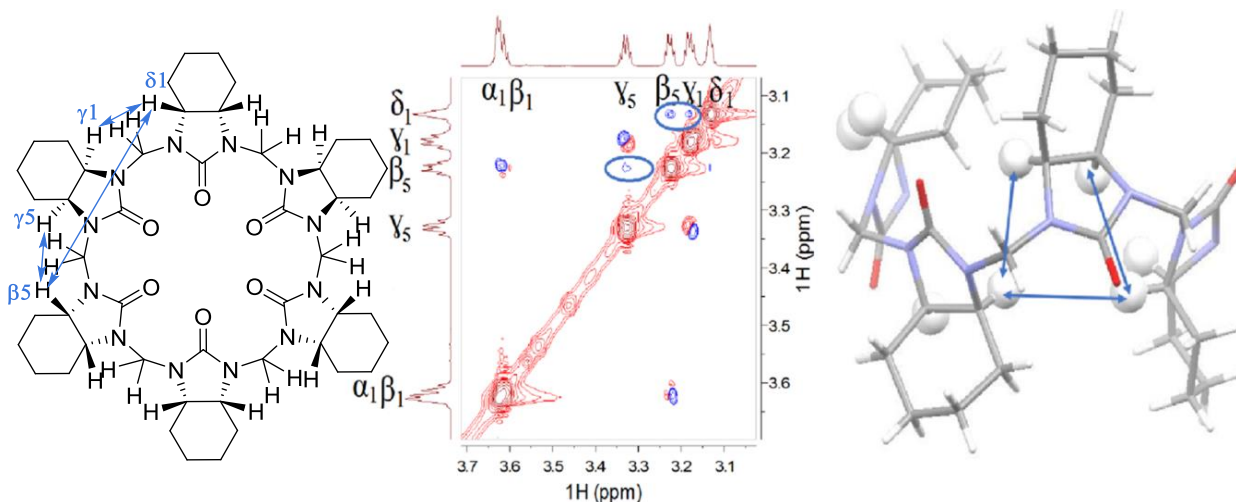

**Figure S7.** Part of a NOESY spectrum indicating hydrogen atoms, which are in close proximity with each other. The crystal structure shows the same hydrogens in the solid state and demonstrates their close proximity. We have omitted two monomer units in the crystal structure for clarity. The arrows indicate NOE correlations.

**Table S4.** Summary of cross peaks from the 2D NMR experiments.

| COSY                    | HMBC                       | NOESY                   |
|-------------------------|----------------------------|-------------------------|
| $\gamma_1$ - $\gamma_5$ | $\alpha_1$ - $\alpha_{10}$ | $\gamma_1$ - $\delta_1$ |
| $\beta_1$ - $\beta_5$   | $\beta_1$ - $\alpha_{10}$  | $\beta_5$ - $\delta_1$  |
|                         | $\beta_5$ - $\beta_{10}$   | $\gamma_5$ - $\beta_5$  |
|                         | $\gamma_5$ - $\beta_{10}$  |                         |
|                         | $\gamma_1$ - $\gamma_{10}$ |                         |
|                         | $\delta_1$ - $\gamma_{10}$ |                         |

The rest of the hydrogen and carbon atoms were assigned in analyzing the COSY and the HSQC spectra and their chemical shifts and coupling constants are brought further.

$^1\text{H}$  NMR (400 MHz,  $\text{CDCl}_3$ )  $\delta$  (ppm)

4.75 and 4.77 (d,  $J=14.5$  Hz, 4H,  $\gamma_{10}$  and 2H,  $\delta_{10}$ ), 4.72 and 4.74 (d,  $J=14.5$  Hz, 4H,  $\beta_{10}$ ), 4.65-4.62 and (dd,  $J=14.5$  Hz, 2H,  $\alpha_{10}$ ), 3.59-3.58 (m, 2H,  $\alpha_1$  and  $\alpha_5$ ), 3.56 (dt,  $J=7.5$ ; 5.5 Hz, 2H,  $\beta_1$ ), 3.28 (dt,  $J=7.2$ ; 5.3 Hz, 2H,  $\gamma_5$ ), 3.19 (dt.,  $J=7.5$ ; 4.6 Hz, 2H,  $\beta_5$ ), 3.13 (dt.,  $J=7.2$ ; 5.0 Hz, 2H,  $\gamma_1$ ), 3.08 (t,  $J=3.8$  Hz, 2H,  $\delta_1$  and  $\delta_5$ ), 2.15-2.11 and 1.63-1.59 (m, 4H,  $\beta_6$ ), 2.08-2.04 and 1.61-1.56 (m, 4H,  $\beta_9$ ), 1.91-1.87 and 1.66-1.62 (m, 4H,  $\gamma_9$ ), 1.87-1.83 and 1.63-1.58 (m, 4H,  $\gamma_6$ ), 1.87-1.78 (m, 4H,  $\delta_6$  and  $\delta_9$ ), 1.85-1.74 (m, 4H,  $\alpha_6$  and  $\alpha_9$ ), 1.52-1.49 and 1.28-1.25 (m, 4H,  $\gamma_7$ ), 1.57-1.51 and 1.24-1.19 (m, 4H,  $\delta_7$  and  $\delta_8$ ), 1.62-1.58 and 1.31-1.27 (m, 4H,  $\beta_8$ ), 1.45-1.41 and 1.37-1.32 (m, 4H,  $\gamma_8$ ), 1.43-1.38 (m, 4H,  $\beta_7$ ), 1.35-1.30 and 1.20-1.13 (m, 4H,  $\alpha_7$  and  $\alpha_8$ ).

$^{13}\text{C}$  NMR (101 MHz,  $\text{CDCl}_3$ )  $\delta$  (ppm)

162.02 ( $\alpha_3$ ), 161.18 ( $\gamma_3$ ), 160.39 ( $\beta_3$ ), 160.80 ( $\delta_3$ ), 55.10 ( $\alpha_1$  and  $\alpha_5$ ), 52.61 ( $\beta_1$ ), 51.85 ( $\delta_1$  and  $\delta_5$ ), 51.79 ( $\beta_5$ ), 51.59 ( $\gamma_1$ ), 51.29 ( $\gamma_5$ ), 48.32 ( $\alpha_{10}$ ), 46.54 ( $\beta_{10}$ ), 46.24 ( $\gamma_{10}$  and  $\delta_{10}$ ), 26.46 ( $\alpha_6$  and  $\alpha_9$ ), 25.79 ( $\beta_9$ ), 25.57 ( $\gamma_6$ ), 24.88 ( $\gamma_9$ ), 24.81 ( $\delta_6$  and  $\delta_9$ ), 24.49 ( $\beta_6$ ), 21.29 ( $\alpha_7$  and  $\alpha_8$ ), 20.97 ( $\beta_8$ ), 20.79 ( $\gamma_7$ ), 20.71 ( $\delta_7$  and  $\delta_8$ ), 20.26 ( $\gamma_8$ ), 20.06 ( $\beta_7$ ).

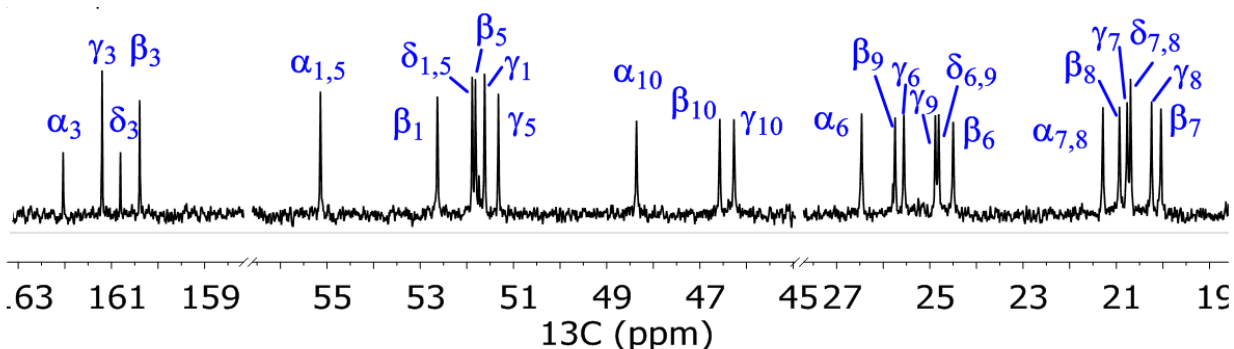

**Figure S8.**  $^{13}\text{C}$ -NMR spectra of *i-cis-cycHC[6] 1* with atom numbers.



$^1\text{H}$  and  $^{13}\text{C}$ -NMR spectra of *cis*-cycHC[6] **2**

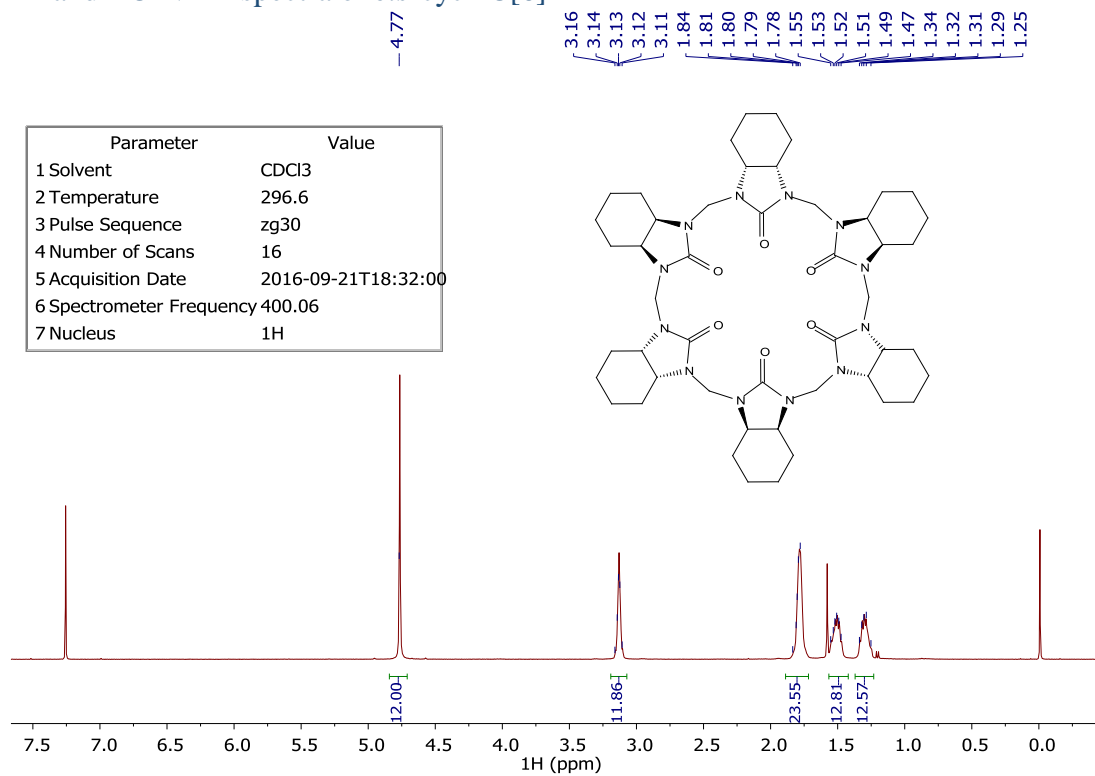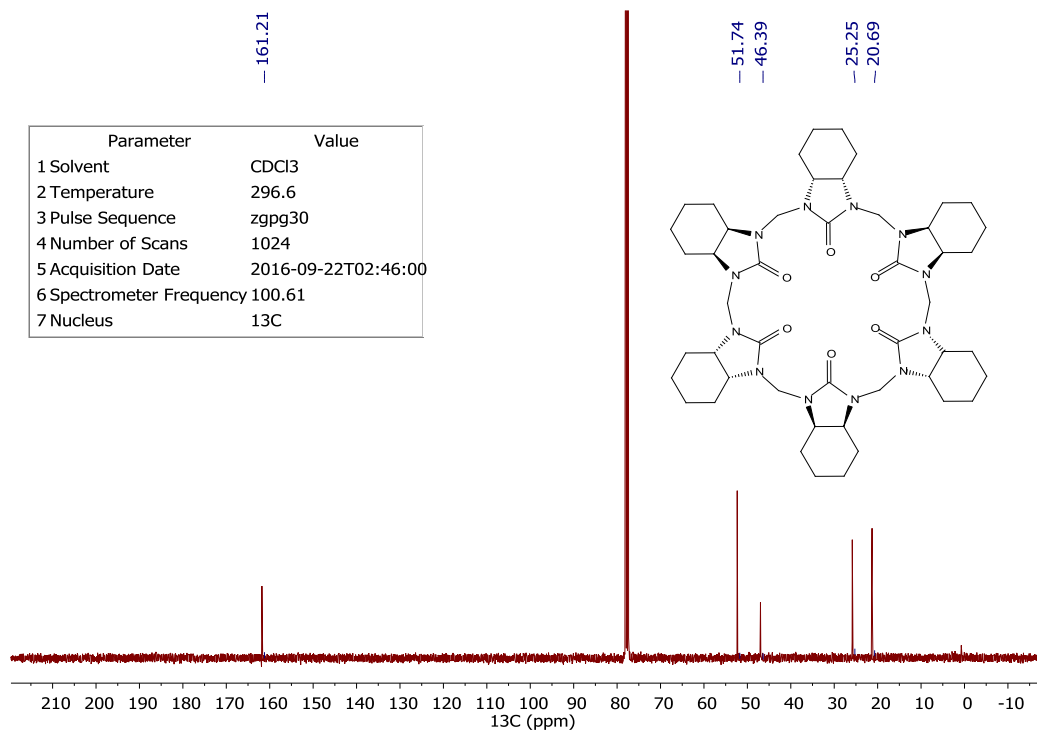



<sup>1</sup>H and <sup>13</sup>C-NMR spectra of (*R,S*)-(*N,N'*-dimethyl)-cyclohexa-1,2-diylurea **7**

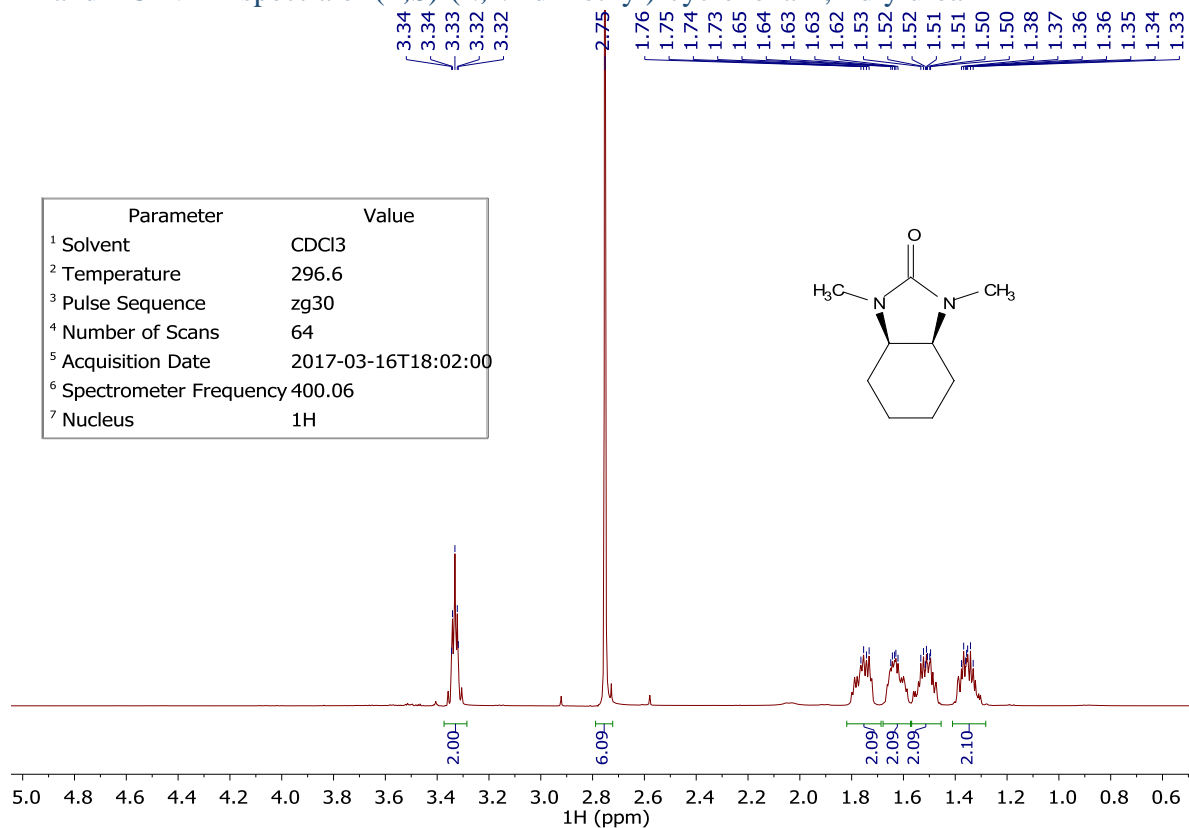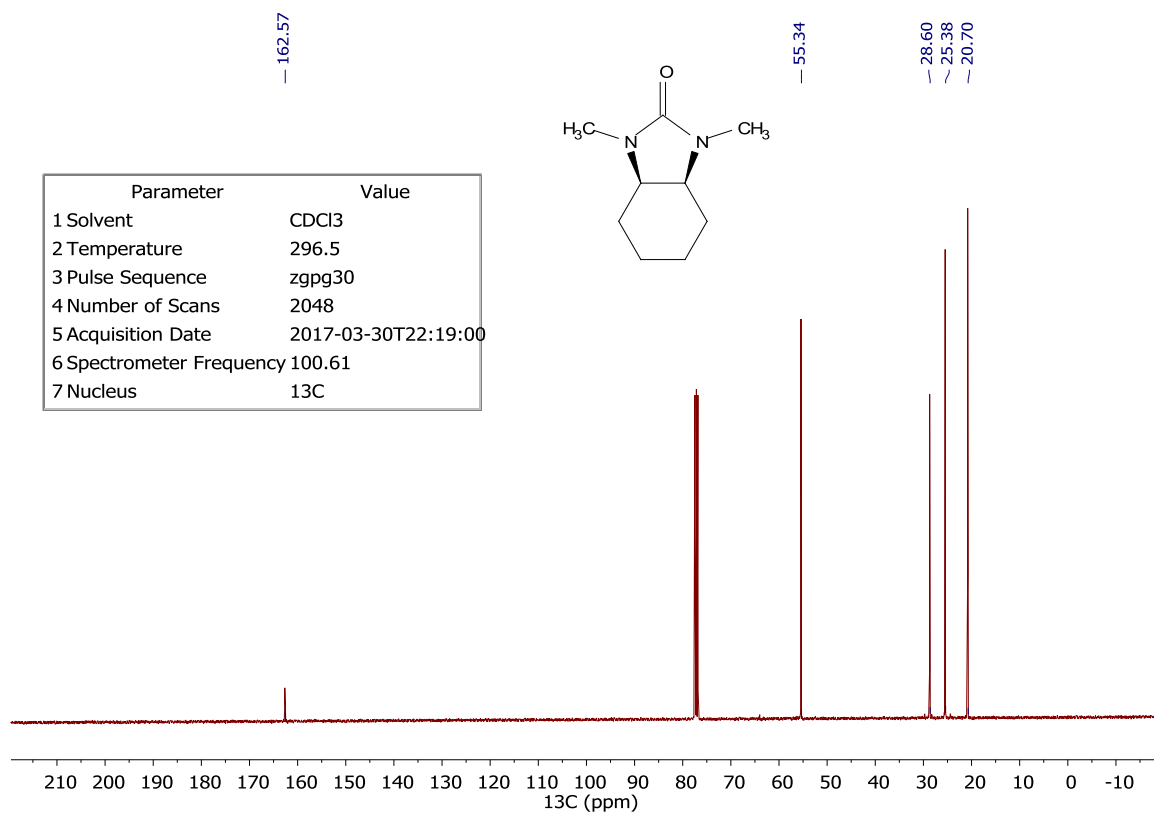

<sup>1</sup>H and <sup>13</sup>C-NMR spectra of rac. (*R*\*,*R*'-)-(*N,N*'-dimethyl)-cyclohexa-1,2-diylurea **8**

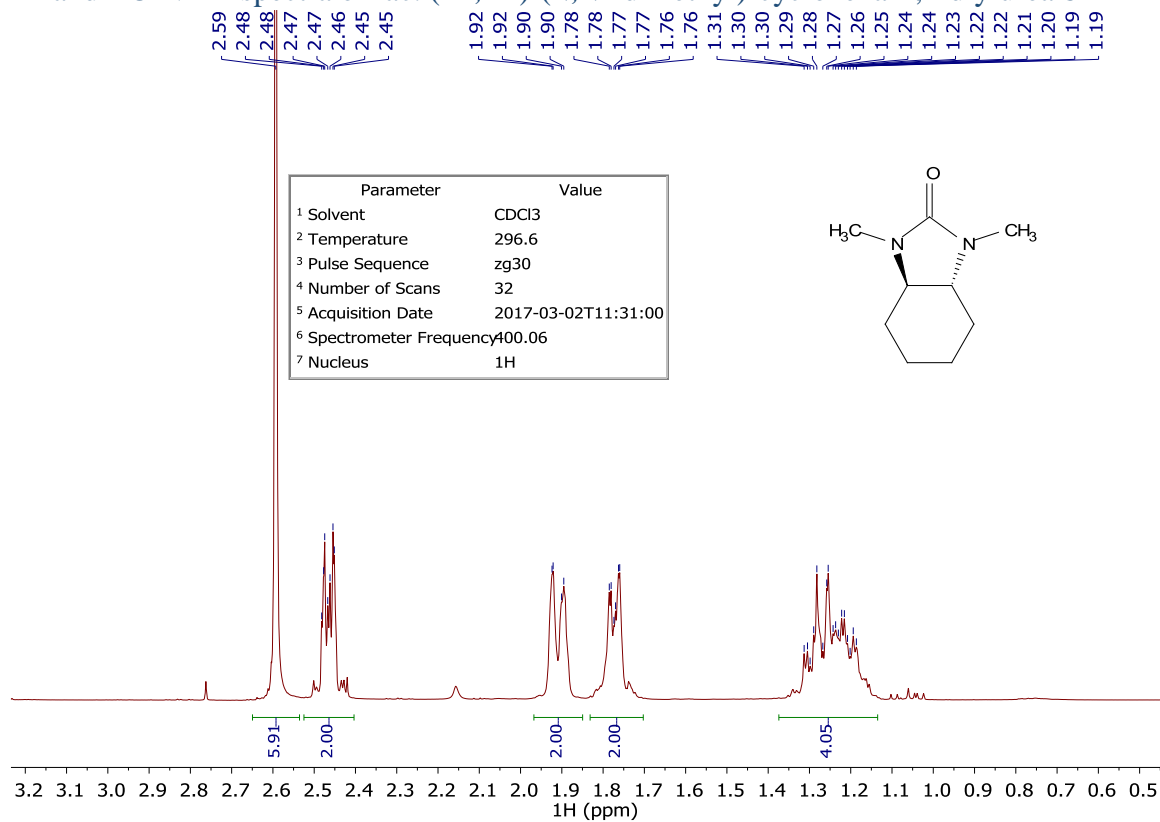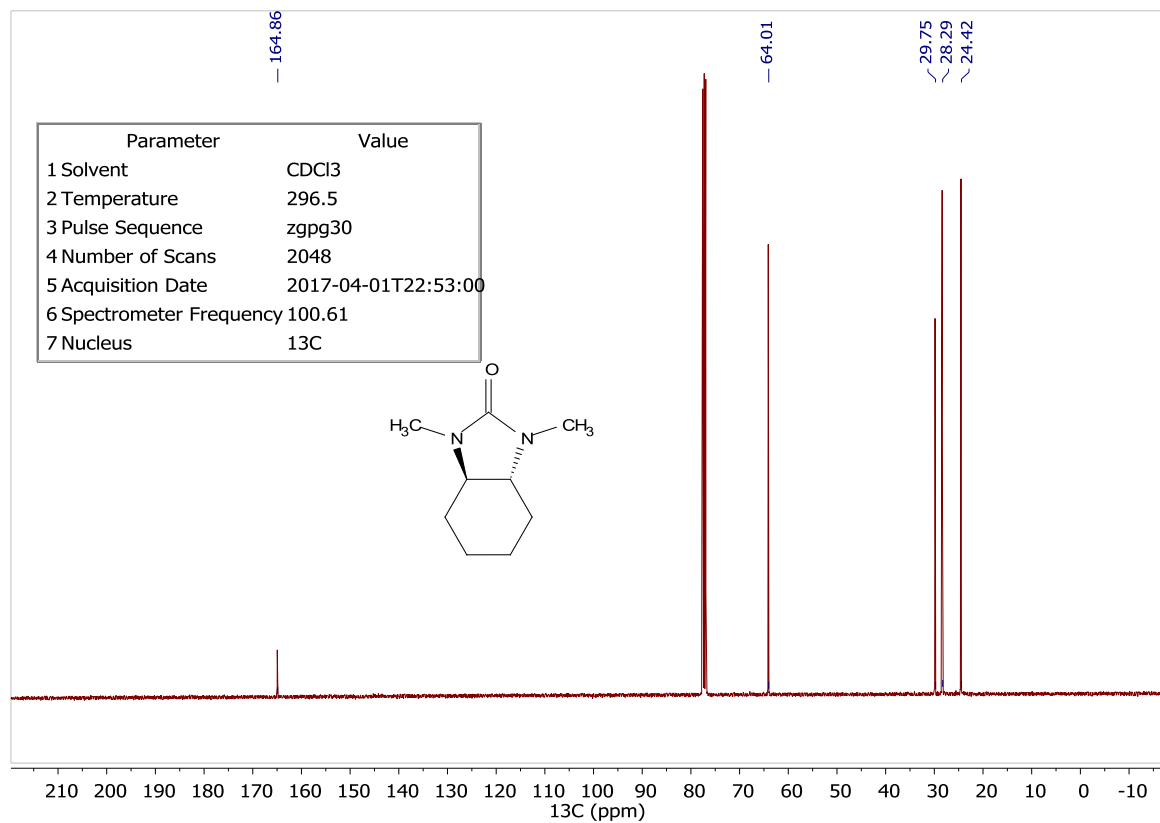

## Crystallographic analysis of *inverted-cis-cycHC*[6] **1**

Single crystal X-ray diffraction data was collected at 123K on Rigaku Compact HomeLab diffractometer, equipped with a Saturn 944 HG CCD detector and Oxford Cryostream cooling system using monochromatic Cu- $K\alpha$  radiation (1.54178Å) from a MicroMax<sup>TM</sup>-003 sealed tube microfocus X-ray source. The strategy of data collection was calculated using Rigaku *CollectionStrategy*<sup>7</sup>. CrysAlisPro<sup>8</sup> was used for data reduction and empirical absorption correction using spherical harmonics implemented in *SCALE3ABSPACK* scaling algorithm<sup>9</sup>. The structure was solved using *SHELXT*<sup>10</sup> and refined by full-matrix least-squares method against  $F^2$  with *SHELXL-2014*<sup>10</sup> through *OLEX2*<sup>11</sup> program package. All non-hydrogen and non-deuterium atoms were refined with anisotropic atomic displacement parameters. Hydrogen atoms attached to carbon atoms were treated as riding atoms, using isotropic displacement parameters  $U_{\text{iso}}(\text{H}) = 1.2U_{\text{iso}}(\text{C})$  for CH and CH<sub>2</sub>. The figures were drawn using the program Mercury CSD 3.9<sup>12</sup> and POV-Ray 3.7<sup>13</sup>.

### Crystal data

C<sub>54</sub>H<sub>72</sub>Cl<sub>18</sub>D<sub>6</sub>N<sub>12</sub>O<sub>6</sub>,  $M = 1635.42$  g/mol, triclinic,  $P-1$  (no. 2),  $a = 12.5904(4)$  Å,  $b = 12.8566(4)$  Å,  $c = 13.5535(5)$  Å,  $\alpha = 62.870(3)^\circ$ ,  $\beta = 73.384(3)^\circ$ ,  $\gamma = 75.940(3)^\circ$ ,  $V = 1854.63(12)$  Å<sup>3</sup>,  $Z = 1$ , Cu- $K\alpha$  radiation ( $\lambda = 1.54184$ Å) at  $T = 123.0$  K,  $\mu(\text{Cu-}K\alpha) = 6.531$  mm<sup>-1</sup>, 18638 reflections measured ( $7.392^\circ \leq 2\theta \leq 134.554^\circ$ ) of which 6432 unique (5532 with  $I > 2\sigma(I)$ ),  $R_{\text{int}} = 0.0368$ ,  $R_1[F^2 > 2\sigma(F^2)] = 0.0862$ ,  $wR_2(\text{all data}) = 0.2309$ ,  $S = 1.06$ . The crystallographic data is deposited with the Cambridge Crystallographic Data Centre (CCDC 1569570) and can be obtained free of charge from The Cambridge Crystallographic Data Centre via [www.ccdc.cam.ac.uk/data\\_request/cif](http://www.ccdc.cam.ac.uk/data_request/cif).

The compound crystallizes in a centrosymmetric space group  $P-1$ , with half of the macrocycle and three solvent molecules in the asymmetric unit. An inversion center is located at the centre of the cavity of *i-cis-cycHC*[6] **1**. The position of the inverted monomer in the hexameric *cycHC*[6] appears to be disordered between four locations (Figure 9 A). Two independent disorder components were found for two neighboring monomers in the asymmetric unit. The relative occupancies of these were refined freely with the sum of site occupation factors restrained to be a constant at 0.500, resulting in sof 0.330(2) and 0.170(2) for the two sites respectively. The remaining two disorder components are generated by symmetry around the inversion center.

The packing of the macrocycles seems not to be affected by the position of the inverted monomer, as the crystal structure is largely isostructural to the *cis-cycHC*[6] previously reported in the literature (CCDC 716122). This is most likely due to the fact that the orientation of the hydrogen bond accepting carbonyl group in the inverted monomer is not drastically changed compared to the other monomers, so the hydrogen bonding to the solvent is not altered by the presence of the inverted monomer (Figure 9 B).

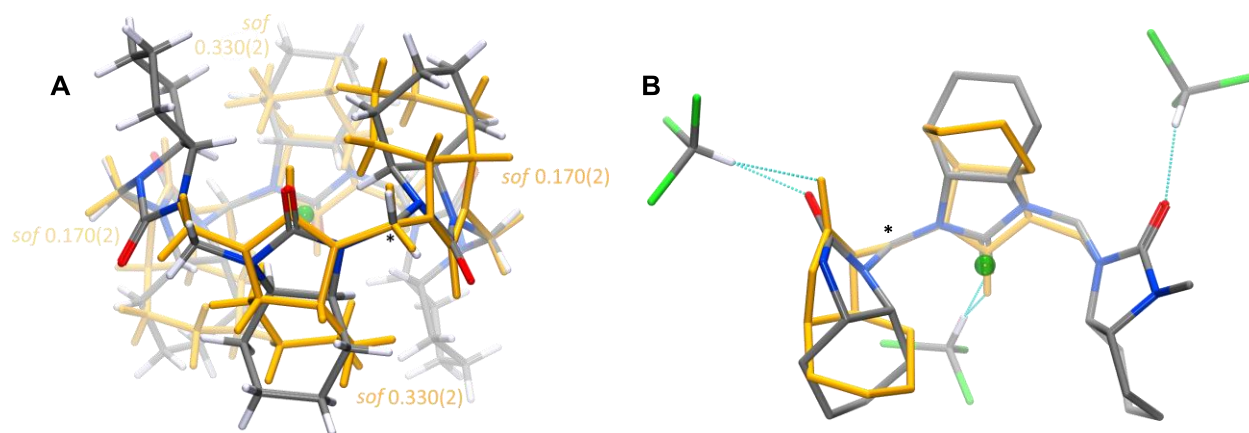

**Figure S9.** A) *i-cis-cycHC[6] 1* in the crystal structure, showing in orange the four positional disorder components of the inverted monomer around the hexameric macrocycle with respective site occupancies and B) the asymmetric unit of the crystal structure showing the interactions to the surrounding chloroform molecules. The inversion centre located at the center of the cavity is depicted in green. The carbon atom marked with an asterisk is modeled with full occupancy.

The chloroform molecules in the structure, which make up channels along the unit cell *c*-axis have high degree of freedom and are thus more disordered. These were modeled in three disorder components each. The occupancies of the disorder components were allowed to refine freely, and resulted in *sof* 0.471(3)/0.276(3)/0.253(3) and *sof* 0.485(3)/0.363(3)/0.152(3). The relatively large anisotropic displacement ellipsoids of these solvent molecules and the remaining electron density (max 0.47) in close vicinity indicate further disorder, but modeling more than three disorder components per site was not attempted. The third chloroform molecule in the asymmetric unit was modeled in two disorder components, with the relative occupancy of the two components refined freely, giving *sof* 0.788(9)/0.212(9).

## Computational studies

### General information

The effect of chloride ion on different stages of the formation of cyclohexanohemicucurbit[6]urils was studied computationally. The input coordinates of *cis*-cycHC[6] **2** and *i-cis*-cycHC[6] **1** were generated from the X-ray crystal structures of the molecules. All geometries were fully optimized, and stationary points characterized with vibrational analysis. In the case of the system HCl@**1 B** (described below), a residual imaginary vibration of  $3.03\text{ cm}^{-1}$  remained; all other systems were characterized as true minima. Vibrational zero-point energies were added to electronic energies and the resulting differences evaluated. All the calculations were performed with the density functional theory, using the functional BP86, the basis set def2-TZVP<sup>14,15,16,17</sup> and the program package Turbomole 6.3.<sup>18</sup>

### Methylated *R,S,S,R*- and *R,S,R,S*-ordered dimers

From the optimized isomeric cyclic structures both *R,S,S,R*- and *R,S,R,S*-ordered dimers were isolated and their methylated geometries (**9** and **10**) optimized (Figure S10). Next, the effect of the presence of chloride ion close to named dimers was modelled (Figure S11), adding the chloride ion „inside“ of the dimer, where it would mimic the chloride ion's position being in the cavity of the cycles. From the optimized Cl<sup>-</sup>@*R,S,S,R*-ordered dimer and Cl<sup>-</sup>@*R,S,R,S*-ordered dimer complexes the chloride ions were then removed and single-point calculations (SPC) for both dimers were performed.

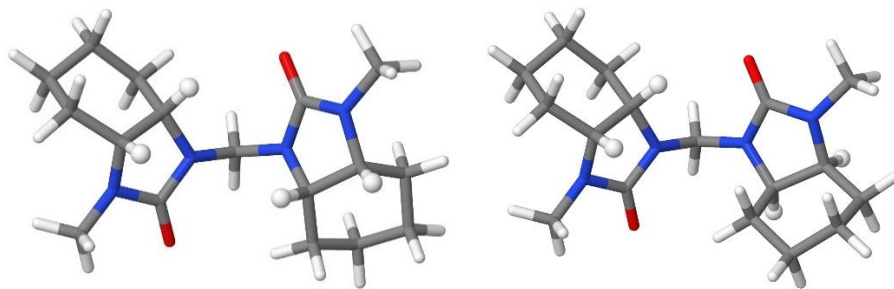

**Figure S10.** DFT models of dimers **9** (C-shaped and *R,S,S,R*-ordered) and **10** (S-shaped and *R,S,R,S*-ordered).

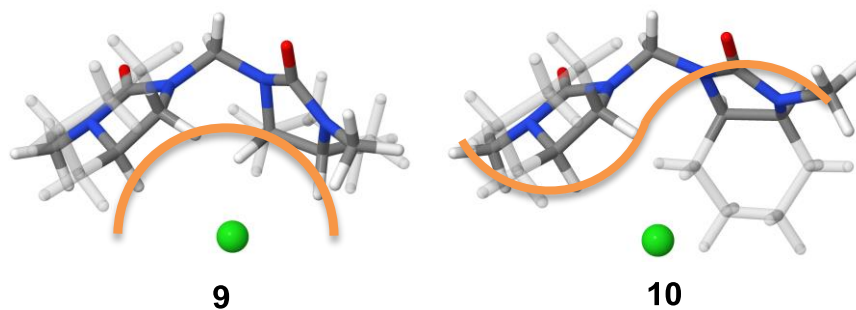

**Figure S11.** DFT models of dimers **9** (C-shaped and *R,S,S,R*-ordered) and **10** (S-shaped and *R,S,R,S*-ordered) complexes with chloride anion.

### Macrocycles without and with chloride ion

Geometries of diastereomeric cycHC[6] macrocycles **1** and **2** were optimized with an included chloride ion and without it. Without the chloride, compound **1** has 17 kJ/mol higher energy than **2**. Upon encapsulation of the chloride anion, the energy difference is increased to 30 kJ/mol (Figure S12).

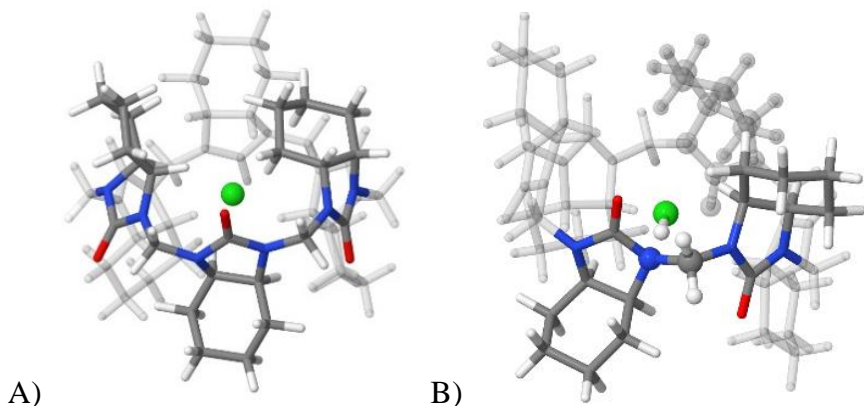

**Figure S12.** DFT models A) Cl<sup>-</sup>@**1** complex and B) lowest energy geometry HCl@**1** formed during geometry optimisation of iminium chloride intermediate.

### Iminium intermediates

Modelling of the formation of **1** and **2** from six-membered iminium intermediates unexpectedly showed, that all the studied hexameric iminium chloride geometries formed HCl@cycHC[6] inclusion complexes upon energy minimization. Therefore, we can state that the final macrocyclisation step proceeds without a transition state. Even more significantly, the resulting inclusion complexes of the diastereomeric macrocycles with hydrochloric acid were energetically very similar. The lowest-energy geometry of the HCl inclusion complex of **1**, which is depicted in Figure S12 B, was even 1.5 kJ/mol lower than that of **2**.

Initial geometries for seven different iminium intermediates were obtained from optimized geometries of corresponding closed cycles (Figure S12a) via moving atoms apart at the appropriate C-N bond (shown on Figure S12b). The bond was broken by changing a bond angle at the opposite side of the macrocycle and adding a proton to the nitrogen atom of the broken bond. Then the chloride ion was positioned in the middle of the cavity of all different iminium intermediates (Figure S12b) and the reactions between the intermediates and the chloride ion were modelled. In the structure of *cis*-cycHC[6] **2** all C-N bonds in methylene bridges are equivalent, therefore only a single iminium structure with encapsulated Cl<sup>-</sup> anion was built. The inverted isomer has six non-equivalent C-N bonds, therefore six iminium chloride complexes were constructed. All the studied oligomeric iminium chloride geometries formed HCl@cycHC[6] inclusion complexes upon energy minimization. All the HCl@*i-cis*-cycHC[6] complexes formed from the “pairs” of the iminium intermediates of *i-cis*-cycHC[6] **1** (A1 and A2, B1 and B2, C1 and C2) had the same final structures with almost equivalent energies. Therefore as a result of seven different cyclisation reactions only four different HCl@cycHC[6] complexes were formed: one HCl@*cis*-cycHC[6] and three HCl@*i-cis*-cycHC[6] (Figure S12c). The final structures and energies are given for the complexes with the lowest energies, as the

energy difference between the same complexes formed from different input geometries (for example complex A formed from either A1 or A2) was below  $1 \text{ kJ}\cdot\text{mol}^{-1}$ .

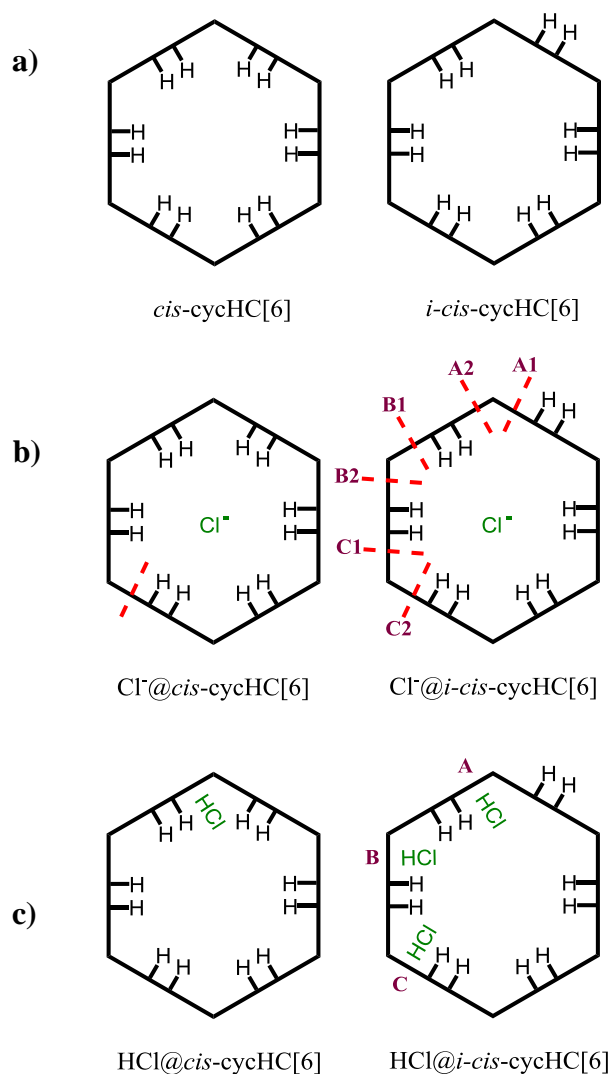

**Figure S13.** a) A schematic representation of *cis*-cycHC[6] **2** and *i-cis*-cycHC[6] **1** with inverted monomer depicted with outward-projecting hydrogens. b) A schematic representation of the formation of seven iminium intermediates, where the dotted red line indicates the location of the broken C-N bond. After the breakage of the bond a proton was added to the nitrogen atom of the broken bond and chloride ion into the cavity of the intermediate. c)  $\text{HCl}@i\text{-cis-cycHC[6]}$  and three  $\text{HCl}@i\text{-cis-cycHC[6]}$  complexes showing the position of HCl in formed complexes. All the pairs of the intermediates (A1 and A2, B1 and B2, C1 and C2), when supplemented with a chloride ion, led to formation of the same  $\text{HCl}@i\text{-cis-cycHC[6]}$  complex, A, B, or C, respectively.

Energies of studied compounds

**Table S5.** Main results of computations.

| Molecule                                                            | DFT energy,<br>a.u. | ZPE, a.u. | E(DFT)+ZPE,<br>a.u. | Relative<br>energy,<br>kJ·mol <sup>-1</sup> |
|---------------------------------------------------------------------|---------------------|-----------|---------------------|---------------------------------------------|
| <i>cis</i> -cycHC[6] <b>2</b>                                       | -2982.3279797       | 1.1758775 | -2981.1521022       | 0                                           |
| <i>i-cis</i> -cycHC[6] <b>1</b>                                     | -2982.3213605       | 1.1759102 | -2981.1454503       | 17.5                                        |
| Cl <sup>-</sup> @ <i>cis</i> -cycHC[6] Cl <sup>-</sup> @ <b>2</b>   | -3442.7169059       | 1.1761083 | -3441.5407976       | 0                                           |
| Cl <sup>-</sup> @ <i>i-cis</i> -cycHC[6] Cl <sup>-</sup> @ <b>1</b> | -3442.7051891       | 1.1757239 | -3441.5294652       | 29.8                                        |

  

| Molecule                                                                           | DFT energy,<br>a.u. | ZPE, a.u. | E(DFT)+ZPE,<br>a.u. | Relative<br>energy,<br>kJ·mol <sup>-1</sup> |
|------------------------------------------------------------------------------------|---------------------|-----------|---------------------|---------------------------------------------|
| <i>R,S,S,R</i> -ordered dimer <b>9</b>                                             | -1034.6326172       | 0.4373198 | -1034.1952974       | 0                                           |
| <i>R,S,R,S</i> -ordered dimer <b>10</b>                                            | -1034.6313471       | 0.4371914 | -1034.1941557       | 3.0                                         |
| Cl <sup>-</sup> @ <i>R,S,S,R</i> -ordered dimer Cl <sup>-</sup> @ <b>9</b>         | -1494.9933009       | 0.4371933 | -1494.5561076       | 0                                           |
| Cl <sup>-</sup> @ <i>R,S,R,S</i> -ordered dimer Cl <sup>-</sup> @ <b>10</b>        | -1494.9879286       | 0.4370796 | -1494.5508490       | 13.8                                        |
| SPC of <i>R,S,S,R</i> -ordered dimer <b>9</b> with<br>the removed Cl <sup>-</sup>  | -1034.6245332       |           |                     | 0                                           |
| SPC of <i>R,S,R,S</i> -ordered dimer <b>10</b> with<br>the removed Cl <sup>-</sup> | -1034.6268491       |           |                     | -6.1                                        |

  

| Molecule                                    | DFT energy,<br>a.u. | ZPE, a.u. | E(DFT)+ZPE,<br>a.u. | Relative<br>energy,<br>kJ·mol <sup>-1</sup> |
|---------------------------------------------|---------------------|-----------|---------------------|---------------------------------------------|
| HCl@ <i>cis</i> -cycHC[6] HCl@ <b>2</b>     | -3443.1936880       | 1.1848601 | -3442.0088279       | 0                                           |
| HCl@ <i>i-cis</i> -cycHC[6] HCl@ <b>1 A</b> | -3443.1933374       | 1.1845829 | -3442.0087545       | 0.2                                         |
| HCl@ <i>i-cis</i> -cycHC[6] HCl@ <b>1 B</b> | -3443.1929023       | 1.1849358 | -3442.0079665       | 2.3                                         |
| HCl@ <i>i-cis</i> -cycHC[6] HCl@ <b>1 C</b> | -3443.1938778       | 1.1844665 | -3442.0094113       | -1.5                                        |



## Optimized geometries of key compounds

### *cis*-cycHC[6] **2** coordinates in angstroms

138

|   |            |            |            |
|---|------------|------------|------------|
| O | 7.1171526  | 9.3811765  | 10.0852672 |
| N | 9.1614080  | 8.2634392  | 9.8830616  |
| N | 7.3262618  | 7.2980074  | 9.0276245  |
| C | 7.7949623  | 8.4237963  | 9.7087597  |
| C | 9.5676491  | 6.8981064  | 9.5075311  |
| H | 10.5589474 | 6.9123589  | 9.0339609  |
| C | 8.4724263  | 6.5591874  | 8.4671333  |
| H | 8.7517509  | 7.0264169  | 7.5016906  |
| C | 8.2463719  | 5.0645664  | 8.2277029  |
| H | 9.0772133  | 4.7164341  | 7.5901220  |
| H | 7.3348412  | 4.9266426  | 7.6268873  |
| C | 8.2255950  | 4.2230511  | 9.5074629  |
| H | 8.1341226  | 3.1581988  | 9.2446483  |
| H | 7.3402845  | 4.4761628  | 10.1144669 |
| C | 9.4934184  | 4.4739950  | 10.3306121 |
| H | 9.5027067  | 3.8485269  | 11.2358113 |
| H | 10.3807687 | 4.1828511  | 9.7407721  |
| C | 9.5858872  | 5.9520133  | 10.7275618 |
| H | 10.4985347 | 6.1420682  | 11.3113877 |
| H | 8.7275130  | 6.1979483  | 11.3740629 |
| C | 6.0414913  | 7.3641322  | 8.3554180  |
| H | 5.6714325  | 6.3454021  | 8.1847447  |
| H | 5.3607392  | 7.8938045  | 9.0351925  |
| O | 5.7725679  | 6.1114908  | 5.7551940  |
| N | 5.6404950  | 8.2813729  | 4.8742054  |
| N | 6.0674041  | 8.0283556  | 7.0619711  |
| C | 5.8221021  | 7.3356479  | 5.8860641  |
| C | 6.1055316  | 9.5964253  | 5.3521554  |
| H | 7.2030360  | 9.6530409  | 5.2072744  |
| C | 5.8204810  | 9.4672927  | 6.8685939  |
| H | 6.5419098  | 10.0592324 | 7.4487450  |
| C | 4.3819188  | 9.8581349  | 7.2706647  |
| H | 4.3237498  | 9.9200573  | 8.3676221  |
| H | 3.6986985  | 9.0535443  | 6.9524558  |
| C | 3.9240626  | 11.1727751 | 6.6276003  |
| H | 2.8929767  | 11.3961499 | 6.9407333  |
| H | 4.5478275  | 12.0096950 | 6.9886820  |
| C | 4.0226118  | 11.0800256 | 5.1014888  |
| H | 3.3650192  | 10.2709522 | 4.7416129  |
| H | 3.6670189  | 12.0085394 | 4.6295539  |
| C | 5.4695495  | 10.8133902 | 4.6759146  |
| H | 6.0849505  | 11.6872197 | 4.9520560  |
| H | 5.5691196  | 10.7157334 | 3.5842575  |
| C | 5.7808765  | 7.8660797  | 3.4903255  |
| H | 5.2745664  | 6.8958702  | 3.4025425  |
| H | 5.2848014  | 8.6001577  | 2.8429200  |
| O | 7.1608642  | 9.6607702  | 1.6803448  |
| N | 7.1549333  | 7.7508128  | 3.0289348  |
| N | 8.9001039  | 8.0868923  | 1.6606469  |
| C | 7.6776039  | 8.6162276  | 2.0806712  |
| C | 7.9411283  | 6.5062396  | 3.0748346  |
| H | 8.0038356  | 6.1325721  | 4.1062550  |
| C | 9.3184239  | 7.0314684  | 2.6013239  |
| H | 9.8236352  | 7.5107818  | 3.4633819  |
| C | 10.2554459 | 5.9656057  | 2.0282014  |
| H | 10.6695387 | 5.4113354  | 2.8881679  |
| H | 11.1177785 | 6.4571401  | 1.5524390  |
| C | 9.5687750  | 4.9716832  | 1.0872330  |
| H | 9.2406937  | 5.4840330  | 0.1671609  |
| H | 10.2904297 | 4.2002435  | 0.7785498  |
| C | 8.3552115  | 4.3373026  | 1.7746991  |
| H | 8.6849420  | 3.7870642  | 2.6737723  |

|   |            |            |            |
|---|------------|------------|------------|
| H | 7.8745867  | 3.5971982  | 1.1168852  |
| C | 7.3379356  | 5.4176968  | 2.1608447  |
| H | 6.9688198  | 5.8989411  | 1.2400633  |
| H | 6.4681809  | 4.9716746  | 2.6656168  |
| C | 9.8548034  | 8.9613741  | 1.0049049  |
| H | 9.2816810  | 9.5762222  | 0.2987320  |
| H | 10.5825876 | 8.3512935  | 0.4550950  |
| O | 12.6553706 | 8.6993354  | 1.7036783  |
| N | 10.6111195 | 9.8170746  | 1.9059152  |
| N | 12.4462735 | 10.7824858 | 2.7613595  |
| C | 11.9775656 | 9.6567106  | 2.0802073  |
| C | 10.2048834 | 11.1824013 | 2.2814744  |
| H | 9.2135886  | 11.1681407 | 2.7550516  |
| C | 11.3001136 | 11.5212968 | 3.3218721  |
| H | 11.0207939 | 11.0540474 | 4.2873065  |
| C | 11.5261711 | 13.0159122 | 3.5613342  |
| H | 10.6953350 | 13.3640310 | 4.1989294  |
| H | 12.4377065 | 13.1538216 | 4.1621459  |
| C | 11.5469390 | 13.8574564 | 2.2815931  |
| H | 11.6384137 | 14.9223027 | 2.5444312  |
| H | 12.4322449 | 13.6043582 | 1.6745768  |
| C | 10.2791095 | 13.6065315 | 1.4584476  |
| H | 10.2698144 | 14.2320203 | 0.5532628  |
| H | 9.3917636  | 13.8976621 | 2.0483010  |
| C | 10.1866374 | 12.1285221 | 1.0614651  |
| H | 9.2739858  | 11.9384808 | 0.4776411  |
| H | 11.0450071 | 11.8826014 | 0.4149526  |
| C | 13.7310456 | 10.7163430 | 3.4335608  |
| H | 14.1011172 | 11.7350677 | 3.6042392  |
| H | 14.4117896 | 10.1866648 | 2.7537827  |
| O | 13.9999962 | 11.9689636 | 6.0337927  |
| N | 14.1320476 | 9.7990741  | 6.9147639  |
| N | 13.7051220 | 10.0521128 | 4.7270037  |
| C | 13.9504440 | 10.7448082 | 5.9029139  |
| C | 13.6669501 | 8.4840436  | 6.4368141  |
| H | 12.5694438 | 8.4274772  | 6.5816993  |
| C | 13.9520006 | 8.6131667  | 4.9203747  |
| H | 13.2305454 | 8.0212547  | 4.3402282  |
| C | 15.3905437 | 8.2222597  | 4.5182977  |
| H | 15.4487062 | 8.1603379  | 3.4213399  |
| H | 16.0738021 | 9.0268178  | 4.8365069  |
| C | 15.8483414 | 6.9075963  | 5.1613566  |
| H | 16.8794153 | 6.6841736  | 4.8482182  |
| H | 15.2245353 | 6.0707067  | 4.8002758  |
| C | 15.7498035 | 7.0003469  | 6.6874688  |
| H | 16.4074357 | 7.8093885  | 7.0473438  |
| H | 16.1053548 | 6.0718153  | 7.1593998  |
| C | 14.3028802 | 7.2670488  | 7.1130500  |
| H | 13.6874375 | 6.3932481  | 6.8369108  |
| H | 14.2033200 | 7.3647089  | 8.2047077  |
| C | 13.9916683 | 10.2143708 | 8.2986424  |
| H | 14.4979898 | 11.1845740 | 8.3864272  |
| H | 14.4877287 | 9.4802863  | 8.9460518  |
| O | 12.6116459 | 8.4197207  | 10.1086421 |
| N | 12.6176079 | 10.3296543 | 8.7600180  |
| N | 10.8724261 | 9.9936206  | 10.1283021 |
| C | 12.0949216 | 9.4642627  | 9.7082941  |
| C | 11.8314145 | 11.5742272 | 8.7140735  |
| H | 11.7687163 | 11.9478610 | 7.6826403  |
| C | 10.4541143 | 11.0490125 | 9.1875863  |
| H | 9.9489141  | 10.5696692 | 8.3255384  |
| C | 9.5170838  | 12.1148941 | 9.7606600  |
| H | 9.1029996  | 12.6691324 | 8.9006687  |
| H | 8.6547467  | 11.6233751 | 10.2364303 |
| C | 10.2037415 | 13.1088521 | 10.7016003 |
| H | 10.5318123 | 12.5965368 | 11.6216953 |
| H | 9.4820816  | 13.8803019 | 11.0102463 |
| C | 11.4173122 | 13.7432099 | 10.0141260 |
| H | 11.0875917 | 14.2934148 | 9.1150286  |
| H | 11.8979276 | 14.4833393 | 10.6719185 |

|   |            |            |            |
|---|------------|------------|------------|
| C | 12.4345946 | 12.6628033 | 9.6280322  |
| H | 12.8036991 | 12.1815924 | 10.5488356 |
| H | 13.3043553 | 13.1088085 | 9.1232553  |
| C | 9.9177192  | 9.1191581  | 10.7840586 |
| H | 10.4908343 | 8.5043249  | 11.4902505 |
| H | 9.1899327  | 9.7292543  | 11.3338481 |

### *i-cis-cyc*HC[6] **1** coordinates in angstroms

138

|   |            |            |            |
|---|------------|------------|------------|
| O | 7.0502881  | 9.3145272  | 10.0812254 |
| N | 9.1057153  | 8.2175910  | 9.9037289  |
| N | 7.2906631  | 7.2420525  | 9.0109295  |
| C | 7.7402424  | 8.3660682  | 9.7035476  |
| C | 9.5128802  | 6.8355214  | 9.5973789  |
| H | 10.5172557 | 6.8235062  | 9.1528384  |
| C | 8.4480837  | 6.4529707  | 8.5404228  |
| H | 8.7662627  | 6.8535105  | 7.5595161  |
| C | 8.2168313  | 4.9468389  | 8.3865628  |
| H | 9.0662454  | 4.5597574  | 7.7973763  |
| H | 7.3311901  | 4.7836297  | 7.7581354  |
| C | 8.1486841  | 4.1772685  | 9.7082101  |
| H | 8.0489720  | 3.1009973  | 9.5000088  |
| H | 7.2509407  | 4.4730740  | 10.2775380 |
| C | 9.3971270  | 4.4560982  | 10.5501836 |
| H | 9.3765851  | 3.8824071  | 11.4889785 |
| H | 10.2955249 | 4.1240227  | 10.0001054 |
| C | 9.4937878  | 5.9525423  | 10.8653204 |
| H | 10.3938368 | 6.1669764  | 11.4603216 |
| H | 8.6229489  | 6.2390510  | 11.4783466 |
| C | 6.0267242  | 7.2873195  | 8.3049307  |
| H | 5.6803299  | 6.2544757  | 8.1612642  |
| H | 5.3200741  | 7.8232712  | 8.9513275  |
| O | 7.0527113  | 9.3468289  | 1.5687385  |
| N | 7.2278707  | 7.4410463  | 2.9107024  |
| N | 8.9171637  | 7.9221783  | 1.5151307  |
| C | 7.6613627  | 8.3478663  | 1.9568227  |
| C | 8.1076523  | 6.2583138  | 2.9292365  |
| H | 8.2094780  | 5.8843588  | 3.9565142  |
| C | 9.4304049  | 6.8911106  | 2.4368731  |
| H | 9.9131580  | 7.3988607  | 3.2951410  |
| C | 10.4348815 | 5.9050795  | 1.8365514  |
| H | 10.9010635 | 5.3729668  | 2.6836770  |
| H | 11.2512638 | 6.4648496  | 1.3556918  |
| C | 9.8098407  | 4.8731295  | 0.8937501  |
| H | 9.4285175  | 5.3691631  | -0.0146813 |
| H | 10.5822353 | 4.1619232  | 0.5639901  |
| C | 8.6600227  | 4.1413533  | 1.5932403  |
| H | 9.0460744  | 3.6082047  | 2.4799184  |
| H | 8.2241124  | 3.3745888  | 0.9344944  |
| C | 7.5723846  | 5.1387675  | 2.0098257  |
| H | 7.1529722  | 5.6010382  | 1.1010666  |
| H | 6.7467924  | 4.6207443  | 2.5207252  |
| C | 9.7983605  | 8.8804755  | 0.8713194  |
| H | 9.1735250  | 9.4730009  | 0.1906888  |
| H | 10.5582975 | 8.3370875  | 0.2955421  |
| O | 12.6038236 | 8.7506301  | 1.5944342  |
| N | 10.5048794 | 9.7627964  | 1.7866674  |
| N | 12.2746173 | 10.7913183 | 2.7037742  |
| C | 11.8734363 | 9.6632978  | 1.9836812  |
| C | 10.0244525 | 11.0946020 | 2.1907077  |
| H | 9.0287004  | 11.0180139 | 2.6488616  |
| C | 11.0843089 | 11.4606606 | 3.2585405  |
| H | 10.8109430 | 10.9581307 | 4.2076844  |
| C | 11.2350508 | 12.9582703 | 3.5365127  |
| H | 10.3806724 | 13.2513173 | 4.1702777  |
| H | 12.1314990 | 13.1252748 | 4.1528445  |
| C | 11.2333596 | 13.8308907 | 2.2776237  |
| H | 11.2698416 | 14.8921936 | 2.5668689  |
| H | 12.1382304 | 13.6348629 | 1.6785501  |

|   |            |            |            |
|---|------------|------------|------------|
| C | 9.9909227  | 13.5401604 | 1.4292562  |
| H | 9.9643902  | 14.1872755 | 0.5396387  |
| H | 9.0822295  | 13.7731513 | 2.0122090  |
| C | 9.9769027  | 12.0700597 | 0.9946744  |
| H | 9.0839822  | 11.8504883 | 0.3908276  |
| H | 10.8556705 | 11.8829094 | 0.3559389  |
| C | 13.5454548 | 10.7662315 | 3.4044637  |
| H | 13.8742303 | 11.7951642 | 3.5971531  |
| H | 14.2603072 | 10.2714420 | 2.7330121  |
| O | 13.8087790 | 11.9917129 | 6.0184230  |
| N | 13.9610935 | 9.8128114  | 6.8721589  |
| N | 13.5141143 | 10.0876962 | 4.6909378  |
| C | 13.7650558 | 10.7688887 | 5.8739233  |
| C | 13.4997173 | 8.5004031  | 6.3841096  |
| H | 12.4038096 | 8.4355993  | 6.5362992  |
| C | 13.7734691 | 8.6485552  | 4.8672694  |
| H | 13.0520709 | 8.0566996  | 4.2867056  |
| C | 15.2114712 | 8.2718964  | 4.4504133  |
| H | 15.2614500 | 8.2229134  | 3.3524870  |
| H | 15.8918135 | 9.0772360  | 4.7731599  |
| C | 15.6823266 | 6.9530003  | 5.0751657  |
| H | 16.7128201 | 6.7402195  | 4.7526612  |
| H | 15.0618210 | 6.1162508  | 4.7081500  |
| C | 15.5930753 | 7.0264513  | 6.6029291  |
| H | 16.2484047 | 7.8348542  | 6.9685106  |
| H | 15.9571287 | 6.0943297  | 7.0611033  |
| C | 14.1473598 | 7.2790988  | 7.0409602  |
| H | 13.5350766 | 6.4054788  | 6.7573486  |
| H | 14.0537661 | 7.3623204  | 8.1343581  |
| C | 13.8564586 | 10.2091350 | 8.2643574  |
| H | 14.3696681 | 11.1755518 | 8.3532113  |
| H | 14.3658479 | 9.4632913  | 8.8876032  |
| O | 12.5102479 | 8.3855757  | 10.0688931 |
| N | 12.4957860 | 10.3255326 | 8.7643043  |
| N | 10.7871858 | 9.9734417  | 10.1759063 |
| C | 11.9919294 | 9.4437104  | 9.7079275  |
| C | 11.7261810 | 11.5810059 | 8.7755918  |
| H | 11.6365107 | 11.9825443 | 7.7567175  |
| C | 10.3569998 | 11.0617461 | 9.2790151  |
| H | 9.8160804  | 10.6161577 | 8.4208212  |
| C | 9.4573680  | 12.1246138 | 9.9141971  |
| H | 9.0241471  | 12.7104740 | 9.0857521  |
| H | 8.6027012  | 11.6329597 | 10.4028701 |
| C | 10.1900676 | 13.0789072 | 10.8611916 |
| H | 10.5424273 | 12.5337007 | 11.7528875 |
| H | 9.4909453  | 13.8504127 | 11.2184356 |
| C | 11.3875126 | 13.7179577 | 10.1503218 |
| H | 11.0341167 | 14.2981004 | 9.2796066  |
| H | 11.9010962 | 14.4321908 | 10.8118085 |
| C | 12.3751081 | 12.6362497 | 9.6979580  |
| H | 12.7696196 | 12.1248948 | 10.5916476 |
| H | 13.2328697 | 13.0855706 | 9.1757314  |
| C | 9.8353245  | 9.0839447  | 10.8175503 |
| H | 10.4043204 | 8.4745782  | 11.5312767 |
| H | 9.0940335  | 9.6860415  | 11.3580594 |
| O | 6.5245188  | 5.9881477  | 5.8063211  |
| N | 5.6891185  | 7.9019508  | 4.7748321  |
| N | 6.0476149  | 7.9546471  | 6.9950391  |
| C | 6.1326202  | 7.1567359  | 5.8496947  |
| C | 5.4472656  | 9.2934649  | 5.1734311  |
| H | 4.5462653  | 9.6788699  | 4.6702477  |
| C | 5.1594876  | 9.1027091  | 6.6848037  |
| H | 4.1104328  | 8.7568739  | 6.7884887  |
| C | 5.3261264  | 10.3638939 | 7.5359430  |
| H | 5.3754151  | 10.0894045 | 8.5997210  |
| H | 4.4037040  | 10.9548654 | 7.4013678  |
| C | 6.5296096  | 11.2353696 | 7.1634958  |
| H | 7.4613986  | 10.7208481 | 7.4493105  |
| H | 6.4934468  | 12.1643466 | 7.7513501  |
| C | 6.5522873  | 11.5322982 | 5.6621032  |

|   |           |            |           |
|---|-----------|------------|-----------|
| H | 7.4045224 | 12.1794204 | 5.4044340 |
| H | 5.6420541 | 12.0892673 | 5.3752177 |
| C | 6.6402078 | 10.2206988 | 4.8756628 |
| H | 6.6875669 | 10.3950925 | 3.7906402 |
| H | 7.5677477 | 9.6968033  | 5.1592713 |
| C | 5.8633013 | 7.4407476  | 3.4075582 |
| H | 5.4677303 | 6.4168057  | 3.3531022 |
| H | 5.2717412 | 8.0966211  | 2.7552293 |

Cl<sup>-</sup> @*cis*-cycHC[6] Cl<sup>-</sup>@2 coordinates in  
angstroms

139

|   |            |            |            |
|---|------------|------------|------------|
| O | 7.0179267  | 9.1894826  | 10.3128981 |
| N | 9.1140409  | 8.2405896  | 9.9022702  |
| N | 7.3115113  | 7.2624369  | 8.9997626  |
| C | 7.7397577  | 8.3320444  | 9.7928382  |
| C | 9.6164326  | 7.0027907  | 9.2939127  |
| H | 10.5441047 | 7.2019221  | 8.7377348  |
| C | 8.4804049  | 6.6943740  | 8.2905651  |
| H | 8.6723745  | 7.3001384  | 7.3839983  |
| C | 8.3528768  | 5.2240376  | 7.8885976  |
| H | 9.1417825  | 5.0344949  | 7.1410423  |
| H | 7.3994432  | 5.0723270  | 7.3588616  |
| C | 8.5246444  | 4.2329664  | 9.0439321  |
| H | 8.4905600  | 3.2018656  | 8.6569653  |
| H | 7.6877708  | 4.3328326  | 9.7564612  |
| C | 9.8451425  | 4.4954384  | 9.7770214  |
| H | 10.0007120 | 3.7600467  | 10.5826704 |
| H | 10.6871526 | 4.3718291  | 9.0731632  |
| C | 9.8522124  | 5.9123414  | 10.3626377 |
| H | 10.8003429 | 6.1203706  | 10.8810519 |
| H | 9.0468527  | 5.9836708  | 11.1140358 |
| C | 6.0100022  | 7.3409142  | 8.3568538  |
| H | 5.6242374  | 6.3294799  | 8.1728911  |
| H | 5.3523696  | 7.8637641  | 9.0664670  |
| O | 5.4751825  | 6.1597804  | 5.7491275  |
| N | 5.6748290  | 8.3338030  | 4.8802349  |
| N | 6.0126695  | 8.0110165  | 7.0712341  |
| C | 5.7034064  | 7.3655447  | 5.8888627  |
| C | 6.3373487  | 9.5617429  | 5.3731279  |
| H | 7.4313694  | 9.4532277  | 5.2422783  |
| C | 6.0425823  | 9.4672393  | 6.8892400  |
| H | 6.8808322  | 9.9043530  | 7.4508912  |
| C | 4.7093669  | 10.1107414 | 7.3303606  |
| H | 4.6936899  | 10.1788987 | 8.4284061  |
| H | 3.8859025  | 9.4393634  | 7.0331083  |
| C | 4.4715796  | 11.4833872 | 6.6911874  |
| H | 3.5036701  | 11.8867429 | 7.0293188  |
| H | 5.2437680  | 12.1978466 | 7.0280011  |
| C | 4.5140574  | 11.3696146 | 5.1634725  |
| H | 3.7232042  | 10.6765318 | 4.8290508  |
| H | 4.3021939  | 12.3430047 | 4.6922971  |
| C | 5.8858994  | 10.8632962 | 4.7065202  |
| H | 6.6441677  | 11.6242486 | 4.9587867  |
| H | 5.9337603  | 10.7479052 | 3.6125100  |
| C | 5.7884221  | 7.9146871  | 3.4936580  |
| H | 5.2617086  | 6.9518243  | 3.4256272  |
| H | 5.2986601  | 8.6495141  | 2.8405877  |
| O | 7.0885414  | 9.5339421  | 1.4543339  |
| N | 7.1490358  | 7.7904856  | 3.0096668  |
| N | 8.9366883  | 8.1022220  | 1.6954056  |
| C | 7.6598223  | 8.5840700  | 2.0002710  |
| C | 8.0340043  | 6.6534816  | 3.2911083  |
| H | 8.0951094  | 6.4774990  | 4.3745779  |
| C | 9.3859460  | 7.2117622  | 2.7897443  |
| H | 9.8046425  | 7.8352404  | 3.6033114  |
| C | 10.4166815 | 6.1532009  | 2.3924460  |
| H | 10.8544804 | 5.7754738  | 3.3321916  |

|   |            |            |            |
|---|------------|------------|------------|
| H | 11.2457792 | 6.6357617  | 1.8516909  |
| C | 9.8408764  | 4.9691449  | 1.6084114  |
| H | 9.4899391  | 5.3052725  | 0.6176319  |
| H | 10.6315389 | 4.2232094  | 1.4285313  |
| C | 8.6680361  | 4.3453184  | 2.3736839  |
| H | 9.0213228  | 3.9830579  | 3.3554896  |
| H | 8.2726272  | 3.4662909  | 1.8398371  |
| C | 7.5514524  | 5.3786280  | 2.5641725  |
| H | 7.1719625  | 5.6697642  | 1.5698251  |
| H | 6.7068411  | 4.9480473  | 3.1228456  |
| C | 9.8720030  | 8.9741362  | 1.0051017  |
| H | 9.2699549  | 9.5691042  | 0.3032999  |
| H | 10.6011291 | 8.3719101  | 0.4468300  |
| O | 12.7470340 | 8.8980911  | 1.4688912  |
| N | 10.6454421 | 9.8366772  | 1.8767070  |
| N | 12.4385934 | 10.8075923 | 2.8034548  |
| C | 12.0194825 | 9.7464677  | 1.9949628  |
| C | 10.1381656 | 11.0686886 | 2.4924998  |
| H | 9.2034323  | 10.8658184 | 3.0352011  |
| C | 11.2649818 | 11.3669031 | 3.5099595  |
| H | 11.0662142 | 10.7538430 | 4.4104823  |
| C | 11.3892268 | 12.8338158 | 3.9268506  |
| H | 10.5932652 | 13.0178506 | 4.6683914  |
| H | 12.3378455 | 12.9798808 | 4.4667556  |
| C | 11.2291518 | 13.8358525 | 2.7793239  |
| H | 11.2602735 | 14.8630686 | 3.1766147  |
| H | 12.0728372 | 13.7423111 | 2.0740733  |
| C | 9.9157494  | 13.5812011 | 2.0309969  |
| H | 9.7684310  | 14.3241660 | 1.2307798  |
| H | 9.0668418  | 13.6989062 | 2.7276044  |
| C | 9.9140093  | 12.1699095 | 1.4322213  |
| H | 8.9712230  | 11.9669347 | 0.9022815  |
| H | 10.7270152 | 12.1049054 | 0.6885982  |
| C | 13.7443445 | 10.7416230 | 3.4381545  |
| H | 14.1224513 | 11.7566196 | 3.6188207  |
| H | 14.4014299 | 10.2244910 | 2.7237287  |
| O | 14.2859051 | 11.9316117 | 6.0384219  |
| N | 14.1224183 | 9.7562571  | 6.9123907  |
| N | 13.7576760 | 10.0726215 | 4.7240079  |
| C | 14.0718372 | 10.7224784 | 5.9022923  |
| C | 13.4661170 | 8.5210031  | 6.4265273  |
| H | 12.3729614 | 8.6227126  | 6.5683910  |
| C | 13.7413471 | 8.6162437  | 4.9072707  |
| H | 12.8975912 | 8.1729008  | 4.3587583  |
| C | 15.0732234 | 7.9821493  | 4.4492025  |
| H | 15.0753583 | 7.9121786  | 3.3511219  |
| H | 15.8958562 | 8.6595466  | 4.7349012  |
| C | 15.3288180 | 6.6119839  | 5.0872178  |
| H | 16.2951578 | 6.2150602  | 4.7371910  |
| H | 14.5573356 | 5.8918328  | 4.7611791  |
| C | 15.3049490 | 6.7271903  | 6.6153285  |
| H | 16.0949388 | 7.4264466  | 6.9389035  |
| H | 15.5300335 | 5.7557648  | 7.0844930  |
| C | 13.9351893 | 7.2240418  | 7.0889926  |
| H | 13.1788696 | 6.4579788  | 6.8468980  |
| H | 13.8996006 | 7.3400693  | 8.1833497  |
| C | 13.9937432 | 10.1799627 | 8.2967678  |
| H | 14.5125542 | 11.1468893 | 8.3670764  |
| H | 14.4827591 | 9.4504343  | 8.9561602  |
| O | 12.6818465 | 8.5535963  | 10.3245216 |
| N | 12.6274807 | 10.2960485 | 8.7674539  |
| N | 10.8278287 | 9.9729522  | 10.0612345 |
| C | 12.1104476 | 9.4986225  | 9.7710870  |
| C | 11.7403277 | 11.4300832 | 8.4813094  |
| H | 11.6920590 | 11.6123015 | 7.3982822  |
| C | 10.3848471 | 10.8641930 | 8.9664037  |
| H | 9.9738969  | 10.2440484 | 8.1461686  |
| C | 9.3467235  | 11.9177679 | 9.3597986  |
| H | 8.9164975  | 12.3005812 | 8.4185470  |
| H | 8.5142104  | 11.4292812 | 9.8899992  |

|    |            |            |            |
|----|------------|------------|------------|
| C  | 9.9107832  | 13.0989518 | 10.1564088 |
| H  | 10.2537795 | 12.7579596 | 11.1482509 |
| H  | 9.1155390  | 13.8405904 | 10.3336581 |
| C  | 11.0880481 | 13.7316781 | 9.4056138  |
| H  | 10.7422344 | 14.0987513 | 8.4228997  |
| H  | 11.4755005 | 14.6089175 | 9.9481851  |
| C  | 12.2100402 | 12.7035931 | 9.2193274  |
| H  | 12.5818472 | 12.4085594 | 10.2153557 |
| H  | 13.0579260 | 13.1402044 | 8.6704735  |
| C  | 9.8936210  | 9.1090713  | 10.7620629 |
| H  | 10.4982885 | 8.5190339  | 11.4658519 |
| H  | 9.1683149  | 9.7171536  | 11.3191024 |
| Cl | 9.9216839  | 8.9517056  | 5.8930069  |

### Cl<sup>-</sup> @ *i-cis*-cycHC[6] Cl<sup>-</sup> @ 1 coordinates in angstroms

139

|   |            |            |            |
|---|------------|------------|------------|
| O | 6.8877417  | 9.1856458  | 10.1965831 |
| N | 9.0182770  | 8.3091087  | 9.8032566  |
| N | 7.2528132  | 7.2647454  | 8.8958089  |
| C | 7.6415305  | 8.3522497  | 9.6810568  |
| C | 9.5555409  | 7.0522243  | 9.2689111  |
| H | 10.4900323 | 7.2405427  | 8.7215510  |
| C | 8.4501779  | 6.6651194  | 8.2586495  |
| H | 8.6584200  | 7.2146228  | 7.3211777  |
| C | 8.3688648  | 5.1664916  | 7.9554802  |
| H | 9.1886896  | 4.9519903  | 7.2487694  |
| H | 7.4442089  | 4.9622924  | 7.3979482  |
| C | 8.5273714  | 4.2530351  | 9.1737510  |
| H | 8.5169143  | 3.1995892  | 8.8498041  |
| H | 7.6726037  | 4.3819151  | 9.8604039  |
| C | 9.8254049  | 4.5817170  | 9.9173354  |
| H | 9.9745170  | 3.9046308  | 10.7740507 |
| H | 10.6849979 | 4.4271441  | 9.2415149  |
| C | 9.7944907  | 6.0329623  | 10.4063313 |
| H | 10.7302877 | 6.2951016  | 10.9223892 |
| H | 8.9757136  | 6.1345219  | 11.1400720 |
| C | 5.9506212  | 7.2524795  | 8.2544308  |
| H | 5.6421991  | 6.2055088  | 8.1217031  |
| H | 5.2588170  | 7.7568106  | 8.9427805  |
| O | 6.9811935  | 9.2796537  | 1.4080686  |
| N | 7.1517307  | 7.5245564  | 2.9440133  |
| N | 8.9394484  | 8.0099646  | 1.6844486  |
| C | 7.6196091  | 8.3756018  | 1.9572596  |
| C | 8.1154001  | 6.4415988  | 3.1992496  |
| H | 8.1517895  | 6.2120267  | 4.2715888  |
| C | 9.4306298  | 7.1216135  | 2.7607231  |
| H | 9.7827900  | 7.7465092  | 3.6048923  |
| C | 10.5503304 | 6.1592723  | 2.3567368  |
| H | 10.9818319 | 5.7721635  | 3.2955563  |
| H | 11.3591802 | 6.7233116  | 1.8662890  |
| C | 10.0903669 | 4.9733255  | 1.5031403  |
| H | 9.7488134  | 5.3270388  | 0.5151722  |
| H | 10.9399199 | 4.2960282  | 1.3202132  |
| C | 8.9434838  | 4.2321628  | 2.1981914  |
| H | 9.2910875  | 3.8508452  | 3.1746177  |
| H | 8.6292070  | 3.3530423  | 1.6124458  |
| C | 7.7501454  | 5.1736432  | 2.3966719  |
| H | 7.3792456  | 5.4819884  | 1.4041740  |
| H | 6.9250018  | 4.6551447  | 2.9081327  |
| C | 9.8236790  | 8.9389054  | 1.0013334  |
| H | 9.1813339  | 9.5313293  | 0.3337667  |
| H | 10.5602496 | 8.3816752  | 0.4064607  |
| O | 12.6993757 | 8.8975805  | 1.4452802  |
| N | 10.5880283 | 9.8027453  | 1.8791033  |
| N | 12.3761389 | 10.7846618 | 2.8067776  |
| C | 11.9646392 | 9.7300803  | 1.9876933  |
| C | 10.0688401 | 11.0209674 | 2.5117660  |

|   |            |            |            |
|---|------------|------------|------------|
| H | 9.1422571  | 10.7993158 | 3.0613707  |
| C | 11.1990909 | 11.3250974 | 3.5237977  |
| H | 11.0137703 | 10.7023353 | 4.4207519  |
| C | 11.3086965 | 12.7898889 | 3.9510885  |
| H | 10.5171035 | 12.9575587 | 4.7011791  |
| H | 12.2598190 | 12.9428842 | 4.4846834  |
| C | 11.1269795 | 13.7998813 | 2.8138681  |
| H | 11.1483525 | 14.8240867 | 3.2195571  |
| H | 11.9659376 | 13.7231796 | 2.1007248  |
| C | 9.8106161  | 13.5353190 | 2.0741385  |
| H | 9.6474153  | 14.2830894 | 1.2814822  |
| H | 8.9661776  | 13.6362415 | 2.7786878  |
| C | 9.8222837  | 12.1292337 | 1.4631062  |
| H | 8.8786151  | 11.9209368 | 0.9362262  |
| H | 10.6304470 | 12.0812365 | 0.7128538  |
| C | 13.6819006 | 10.7166270 | 3.4440905  |
| H | 14.0532603 | 11.7314896 | 3.6389225  |
| H | 14.3432873 | 10.2132765 | 2.7238469  |
| O | 14.1974708 | 11.8786473 | 6.0618335  |
| N | 14.0363167 | 9.6936224  | 6.9087414  |
| N | 13.6970738 | 10.0306067 | 4.7206840  |
| C | 13.9917306 | 10.6695279 | 5.9102192  |
| C | 13.4059809 | 8.4536844  | 6.4029626  |
| H | 12.3070761 | 8.5260993  | 6.5279543  |
| C | 13.6977089 | 8.5718760  | 4.8870982  |
| H | 12.8661037 | 8.1241779  | 4.3236103  |
| C | 15.0432982 | 7.9621115  | 4.4348484  |
| H | 15.0566809 | 7.9027866  | 3.3361175  |
| H | 15.8525981 | 8.6497810  | 4.7339339  |
| C | 15.3161447 | 6.5902467  | 5.0621438  |
| H | 16.2918467 | 6.2126156  | 4.7166877  |
| H | 14.5594763 | 5.8603773  | 4.7230246  |
| C | 15.2769635 | 6.6906282  | 6.5909713  |
| H | 16.0514990 | 7.4009220  | 6.9278903  |
| H | 15.5154190 | 5.7189590  | 7.0530702  |
| C | 13.8938635 | 7.1582522  | 7.0554688  |
| H | 13.1543349 | 6.3807807  | 6.7982179  |
| H | 13.8439159 | 7.2609960  | 8.1506078  |
| C | 13.9246495 | 10.0963087 | 8.2994204  |
| H | 14.4876020 | 11.0362615 | 8.3900609  |
| H | 14.3797531 | 9.3314070  | 8.9427550  |
| O | 12.5226500 | 8.4888114  | 10.2856999 |
| N | 12.5669487 | 10.2721375 | 8.7765542  |
| N | 10.7487866 | 10.0149149 | 10.0620862 |
| C | 12.0048665 | 9.4782142  | 9.7576264  |
| C | 11.7530566 | 11.4678149 | 8.5308733  |
| H | 11.7170580 | 11.6896313 | 7.4551783  |
| C | 10.3650741 | 10.9734380 | 9.0026496  |
| H | 9.9124412  | 10.4083593 | 8.1651445  |
| C | 9.4057990  | 12.0789911 | 9.4478509  |
| H | 8.9986880  | 12.5331872 | 8.5292860  |
| H | 8.5420278  | 11.6277162 | 9.9600455  |
| C | 10.0528948 | 13.1812768 | 10.2922943 |
| H | 10.3843945 | 12.7725430 | 11.2622703 |
| H | 9.3087369  | 13.9628944 | 10.5141744 |
| C | 11.2593418 | 13.7711687 | 9.5537695  |
| H | 10.9267857 | 14.2019660 | 8.5925795  |
| H | 11.7081671 | 14.5974513 | 10.1282824 |
| C | 12.3099925 | 12.6823230 | 9.3090352  |
| H | 12.6769221 | 12.3266463 | 10.2868345 |
| H | 13.1757205 | 13.0861347 | 8.7628045  |
| C | 9.7568428  | 9.1716501  | 10.7068808 |
| H | 10.3025060 | 8.5751231  | 11.4524968 |
| H | 9.0108042  | 9.7972313  | 11.2146826 |
| O | 6.1432013  | 5.9068563  | 5.7294225  |
| N | 5.4958824  | 7.9072873  | 4.7239883  |
| N | 5.8714580  | 7.8966301  | 6.9412292  |
| C | 5.8760701  | 7.1106787  | 5.7926976  |
| C | 5.3502146  | 9.3080617  | 5.1459457  |
| H | 4.4520253  | 9.7423680  | 4.6739087  |

|    |           |            |           |
|----|-----------|------------|-----------|
| C  | 5.0822865 | 9.1165905  | 6.6639948 |
| H  | 4.0092508 | 8.8557553  | 6.7872645 |
| C  | 5.3623562 | 10.3473903 | 7.5292588 |
| H  | 5.4350656 | 10.0484490 | 8.5862340 |
| H  | 4.4710209 | 10.9952358 | 7.4431437 |
| C  | 6.5989240 | 11.1507196 | 7.1189523 |
| H  | 7.5129901 | 10.5724663 | 7.3270318 |
| H  | 6.6459398 | 12.0653342 | 7.7297515 |
| C  | 6.5689108 | 11.4810724 | 5.6254753 |
| H  | 7.4467287 | 12.0841303 | 5.3480425 |
| H  | 5.6757210 | 12.0899109 | 5.3863568 |
| C  | 6.5750871 | 10.1776664 | 4.8214547 |
| H  | 6.5893593 | 10.3722725 | 3.7382263 |
| H  | 7.4983599 | 9.6267513  | 5.0722233 |
| C  | 5.7623896 | 7.4859793  | 3.3565292 |
| H  | 5.3808784 | 6.4582452  | 3.2613691 |
| H  | 5.2087578 | 8.1472863  | 2.6765669 |
| Cl | 9.9278360 | 8.9896380  | 5.9322487 |

### *R,S,S,R*-ordered dimer **9** coordinates in angstroms

51

|   |            |            |            |
|---|------------|------------|------------|
| O | 6.8134701  | 9.2006249  | 10.3957707 |
| N | 8.9578590  | 8.3780153  | 9.9521579  |
| N | 7.1891892  | 7.2370723  | 9.1717690  |
| C | 7.5678688  | 8.3673725  | 9.8970173  |
| C | 9.4994400  | 7.1087829  | 9.4426910  |
| H | 10.4325961 | 7.2839061  | 8.8883742  |
| C | 8.3632893  | 6.6976960  | 8.4741472  |
| H | 8.4938903  | 7.2573538  | 7.5223975  |
| C | 8.3070032  | 5.2041036  | 8.1400488  |
| H | 9.1021871  | 5.0077106  | 7.4010709  |
| H | 7.3585570  | 4.9814090  | 7.6258256  |
| C | 8.5149146  | 4.2843819  | 9.3466503  |
| H | 8.5334484  | 3.2359738  | 9.0115537  |
| H | 7.6668730  | 4.3802241  | 10.0449962 |
| C | 9.8135875  | 4.6473609  | 10.0737667 |
| H | 9.9877272  | 3.9677966  | 10.9216740 |
| H | 10.6704140 | 4.5182305  | 9.3894259  |
| C | 9.7536050  | 6.0936923  | 10.5774685 |
| H | 10.6860945 | 6.3660544  | 11.0931905 |
| H | 8.9355457  | 6.1777628  | 11.3125426 |
| C | 5.8727241  | 7.1954866  | 8.5682940  |
| H | 5.4613126  | 6.1765406  | 8.5878966  |
| H | 5.2185815  | 7.8556793  | 9.1504752  |
| H | 5.8900929  | 7.5478278  | 7.5194471  |
| H | 13.6779616 | 11.0883263 | 7.4240590  |
| C | 13.6102533 | 10.8400513 | 8.4938325  |
| H | 14.1894238 | 11.5854288 | 9.0656337  |
| H | 14.0554469 | 9.8520973  | 8.6636237  |
| O | 12.4140168 | 8.8387278  | 10.2050414 |
| N | 12.2249366 | 10.7735299 | 8.9077861  |
| N | 10.5234769 | 10.2285575 | 10.2648938 |
| C | 11.7962690 | 9.8358291  | 9.8330504  |
| C | 11.3246775 | 11.9311026 | 8.9022630  |
| H | 11.2177026 | 12.3254620 | 7.8784266  |
| C | 10.0027110 | 11.2601232 | 9.3520462  |
| H | 9.5516807  | 10.7589267 | 8.4728388  |
| C | 8.9612547  | 12.2086303 | 9.9489321  |
| H | 8.4928323  | 12.7422019 | 9.1038788  |
| H | 8.1537859  | 11.6183776 | 10.4083239 |
| C | 9.5417647  | 13.2391362 | 10.9213992 |
| H | 9.9177157  | 12.7367288 | 11.8284501 |
| H | 8.7459820  | 13.9254164 | 11.2478764 |
| C | 10.6866181 | 14.0119854 | 10.2588819 |
| H | 10.3042332 | 14.5505810 | 9.3733314  |
| H | 11.0876130 | 14.7788669 | 10.9393691 |
| C | 11.8095499 | 13.0515595 | 9.8491843  |

|   |            |            |            |
|---|------------|------------|------------|
| H | 12.2206288 | 12.5824889 | 10.7579666 |
| H | 12.6361516 | 13.5996897 | 9.3714761  |
| C | 9.6605442  | 9.2421799  | 10.8864603 |
| H | 10.3024495 | 8.6467450  | 11.5496675 |
| H | 8.8907995  | 9.7527805  | 11.4793288 |

### *R,S,R,S*-ordered dimer **10** coordinates in angstroms

51

|   |            |            |            |
|---|------------|------------|------------|
| H | 6.1986863  | 7.8385812  | 9.0639094  |
| C | 5.6807138  | 7.2823977  | 8.2697917  |
| H | 6.1066382  | 6.2739619  | 8.2027173  |
| H | 4.6110318  | 7.1973716  | 8.5396185  |
| O | 6.8557727  | 9.2671270  | 1.3898358  |
| N | 7.2064416  | 7.5020624  | 2.8809251  |
| N | 8.7921738  | 7.9435687  | 1.3562011  |
| C | 7.5396686  | 8.3416786  | 1.8253501  |
| C | 8.1616587  | 6.3870272  | 2.9729575  |
| H | 8.3459055  | 6.1300717  | 4.0254493  |
| C | 9.4117249  | 7.0480860  | 2.3423836  |
| H | 9.9073969  | 7.6711000  | 3.1179771  |
| C | 10.4508449 | 6.0712822  | 1.7854046  |
| H | 11.0104673 | 5.6679958  | 2.6465184  |
| H | 11.1869415 | 6.6263152  | 1.1827789  |
| C | 9.8512937  | 4.9041778  | 0.9947104  |
| H | 9.3835730  | 5.2761401  | 0.0679091  |
| H | 10.6535410 | 4.2142627  | 0.6913254  |
| C | 8.7987016  | 4.1781656  | 1.8387440  |
| H | 9.2706719  | 3.7733388  | 2.7511291  |
| H | 8.3875378  | 3.3159902  | 1.2920720  |
| C | 7.6636017  | 5.1384487  | 2.2125741  |
| H | 7.1625258  | 5.4681675  | 1.2873692  |
| H | 6.9095584  | 4.6262488  | 2.8280434  |
| C | 9.5884050  | 8.8810558  | 0.5899454  |
| H | 8.9024969  | 9.6068912  | 0.1363692  |
| H | 10.1448703 | 8.3687022  | -0.2070700 |
| H | 10.3091327 | 9.4248305  | 1.2292761  |
| O | 6.3048977  | 5.9382561  | 5.8078217  |
| N | 5.6639675  | 7.9188031  | 4.7493449  |
| N | 5.8608049  | 7.9214427  | 6.9820147  |
| C | 5.9807652  | 7.1249077  | 5.8413529  |
| C | 5.5424972  | 9.3251053  | 5.1496232  |
| H | 4.7314604  | 9.8104499  | 4.5843928  |
| C | 5.1252614  | 9.1446447  | 6.6317182  |
| H | 4.0373777  | 8.9192196  | 6.6639552  |
| C | 5.3851130  | 10.3551066 | 7.5328114  |
| H | 5.2640744  | 10.0572784 | 8.5865040  |
| H | 4.5815001  | 11.0840447 | 7.3330902  |
| C | 6.7377235  | 11.0349821 | 7.2987983  |
| H | 7.5562454  | 10.3643362 | 7.6092785  |
| H | 6.8089967  | 11.9358174 | 7.9271123  |
| C | 6.9063370  | 11.3862837 | 5.8171404  |
| H | 7.8603421  | 11.9080583 | 5.6469238  |
| H | 6.1096726  | 12.0868034 | 5.5097242  |
| C | 6.8560447  | 10.1150133 | 4.9620902  |
| H | 6.9798300  | 10.3456600 | 3.8940665  |
| H | 7.6955045  | 9.4626002  | 5.2499696  |
| C | 5.8475432  | 7.4486788  | 3.3923891  |
| H | 5.4874828  | 6.4104583  | 3.3657974  |
| H | 5.2335955  | 8.0700092  | 2.7262062  |

### Cl<sup>-</sup> @ *R,S,S,R*-ordered dimer Cl<sup>-</sup> @ **9** coordinates in angstroms

52

|   |           |           |            |
|---|-----------|-----------|------------|
| O | 6.8378894 | 9.1036898 | 10.9644674 |
|---|-----------|-----------|------------|

|    |            |            |            |
|----|------------|------------|------------|
| N  | 8.9744751  | 8.3652733  | 10.3633116 |
| N  | 7.2054182  | 7.4133037  | 9.3731479  |
| C  | 7.5964171  | 8.3807473  | 10.3091552 |
| C  | 9.5359471  | 7.2917895  | 9.5317016  |
| H  | 10.4074373 | 7.6459656  | 8.9547826  |
| C  | 8.3768213  | 7.0843607  | 8.5336052  |
| H  | 8.4936230  | 7.8510589  | 7.7404806  |
| C  | 8.3594362  | 5.7158230  | 7.8522920  |
| H  | 9.1257727  | 5.7701613  | 7.0608273  |
| H  | 7.3949750  | 5.5708395  | 7.3376433  |
| C  | 8.6734304  | 4.5377678  | 8.7817083  |
| H  | 8.7219859  | 3.6057720  | 8.1942473  |
| H  | 7.8630953  | 4.4072514  | 9.5205464  |
| C  | 9.9942776  | 4.7833192  | 9.5210619  |
| H  | 10.2511688 | 3.9210264  | 10.1580116 |
| H  | 10.8103837 | 4.8925339  | 8.7860725  |
| C  | 9.8926953  | 6.0516014  | 10.3752749 |
| H  | 10.8350785 | 6.2492777  | 10.9082926 |
| H  | 9.1075183  | 5.9032094  | 11.1373043 |
| C  | 5.8951281  | 7.5376497  | 8.7726636  |
| H  | 5.4778087  | 6.5483938  | 8.5316090  |
| H  | 5.2393775  | 8.0385961  | 9.4963422  |
| H  | 5.9224210  | 8.1391058  | 7.8428833  |
| H  | 13.5983137 | 9.1259721  | 7.7843024  |
| C  | 13.8536456 | 9.5001740  | 8.7907825  |
| H  | 14.6430892 | 10.2676344 | 8.7161552  |
| H  | 14.2237756 | 8.6719255  | 9.4080156  |
| O  | 12.4840791 | 8.4754788  | 11.1582241 |
| N  | 12.6654943 | 10.0220127 | 9.4252036  |
| N  | 10.7627473 | 9.9903850  | 10.6169264 |
| C  | 12.0312293 | 9.3890735  | 10.4609390 |
| C  | 11.8474856 | 11.0858831 | 8.8430982  |
| H  | 11.8391565 | 10.9779001 | 7.7455176  |
| C  | 10.4396868 | 10.7165672 | 9.3680937  |
| H  | 10.0261208 | 10.0010918 | 8.6332187  |
| C  | 9.4618423  | 11.8837271 | 9.5270621  |
| H  | 9.0493718  | 12.0925477 | 8.5248103  |
| H  | 8.6061985  | 11.5611356 | 10.1408920 |
| C  | 10.0889770 | 13.1705022 | 10.0726498 |
| H  | 10.4154856 | 13.0207526 | 11.1164176 |
| H  | 9.3358841  | 13.9756116 | 10.0878475 |
| C  | 11.2976726 | 13.5701091 | 9.2192970  |
| H  | 10.9729567 | 13.7253725 | 8.1745402  |
| H  | 11.7216808 | 14.5280508 | 9.5628480  |
| C  | 12.3674429 | 12.4740939 | 9.2843596  |
| H  | 12.7197701 | 12.3924161 | 10.3264279 |
| H  | 13.2443122 | 12.7456016 | 8.6737717  |
| C  | 9.7378706  | 9.1977901  | 11.2756709 |
| H  | 10.2690206 | 8.5941704  | 12.0280656 |
| H  | 9.0007320  | 9.8408049  | 11.7760748 |
| Cl | 10.9371012 | 8.6145480  | 6.5111989  |

### Cl<sup>-</sup> @R,S,R,S-ordered dimer Cl<sup>-</sup> @10 coordinates in angstroms

52

|   |            |           |           |
|---|------------|-----------|-----------|
| H | 5.8616005  | 7.3427735 | 8.8200418 |
| C | 5.2023793  | 7.0371434 | 7.9946814 |
| H | 5.3240126  | 5.9606969 | 7.8213092 |
| H | 4.1515757  | 7.2332956 | 8.2908111 |
| O | 6.4095245  | 8.9355326 | 0.7418276 |
| N | 6.9091484  | 7.6350677 | 2.6216713 |
| N | 8.5140125  | 7.9523775 | 1.0941030 |
| C | 7.1874378  | 8.2496867 | 1.4153950 |
| C | 8.0214791  | 6.7770926 | 3.0551516 |
| H | 8.2146202  | 6.8761570 | 4.1362348 |
| C | 9.1912584  | 7.4573913 | 2.3125815 |
| H | 9.5171480  | 8.3135847 | 2.9369508 |
| C | 10.4141297 | 6.5662816 | 2.1009657 |

|    |            |            |            |
|----|------------|------------|------------|
| H  | 10.9318982 | 6.5608792  | 3.0753561  |
| H  | 11.1019155 | 7.0456138  | 1.3839364  |
| C  | 10.0911072 | 5.1286158  | 1.6807039  |
| H  | 9.6579874  | 5.1121172  | 0.6644539  |
| H  | 11.0214727 | 4.5382044  | 1.6406421  |
| C  | 9.0944832  | 4.5009406  | 2.6623784  |
| H  | 9.5326233  | 4.4963007  | 3.6747488  |
| H  | 8.8894177  | 3.4512305  | 2.3942211  |
| C  | 7.7876659  | 5.3025012  | 2.6707009  |
| H  | 7.3395531  | 5.2625600  | 1.6615959  |
| H  | 7.0603382  | 4.8651597  | 3.3715572  |
| C  | 9.2112221  | 8.8242837  | 0.1747266  |
| H  | 8.4664997  | 9.2719701  | -0.4959504 |
| H  | 9.9427796  | 8.2599709  | -0.4226580 |
| H  | 9.7479145  | 9.6363071  | 0.7029852  |
| O  | 5.4045921  | 5.8055228  | 5.4247917  |
| N  | 5.4487856  | 7.9760162  | 4.5490793  |
| N  | 5.5534298  | 7.7147356  | 6.7703509  |
| C  | 5.4722164  | 7.0281943  | 5.5614277  |
| C  | 5.6864415  | 9.3293565  | 5.0816362  |
| H  | 5.0039164  | 10.0404099 | 4.5852546  |
| C  | 5.2294367  | 9.1260860  | 6.5543725  |
| H  | 4.1211612  | 9.2370061  | 6.5961537  |
| C  | 5.8381903  | 10.0987167 | 7.5705530  |
| H  | 5.6450585  | 9.7195714  | 8.5880250  |
| H  | 5.2736308  | 11.0452200 | 7.4907076  |
| C  | 7.3251888  | 10.3865835 | 7.3483023  |
| H  | 7.9326525  | 9.4768022  | 7.4855403  |
| H  | 7.6703215  | 11.1252158 | 8.0903980  |
| C  | 7.5476769  | 10.8915789 | 5.9214928  |
| H  | 8.6125749  | 11.1171511 | 5.7643708  |
| H  | 6.9781429  | 11.8274031 | 5.7566514  |
| C  | 7.1452565  | 9.8003020  | 4.9250157  |
| H  | 7.2951682  | 10.1433174 | 3.8911153  |
| H  | 7.8463144  | 8.9609836  | 5.0884063  |
| C  | 5.5660818  | 7.5823431  | 3.1608200  |
| H  | 5.1565953  | 6.5598133  | 3.1151168  |
| H  | 4.9643364  | 8.2467314  | 2.5232105  |
| Cl | 10.1502570 | 8.0121877  | 5.6346938  |

### HCl@cis-cycHC[6] HCl@2 final coordinates in angstroms

140

|   |           |           |            |
|---|-----------|-----------|------------|
| O | 6.9017626 | 9.5102083 | 9.6357106  |
| N | 8.6566560 | 7.9772267 | 9.5644394  |
| N | 6.6526655 | 7.3220460 | 8.8153516  |
| C | 7.3456895 | 8.3939171 | 9.3599851  |
| C | 8.8213986 | 6.5498754 | 9.2487794  |
| H | 9.7656129 | 6.3866843 | 8.7092289  |
| C | 7.6242461 | 6.3326788 | 8.2894563  |
| H | 7.9335693 | 6.6654497 | 7.2831671  |
| C | 7.1257116 | 4.8894301 | 8.2022637  |
| H | 7.8380319 | 4.3519726 | 7.5531158  |
| H | 6.1698767 | 4.8701329 | 7.6589161  |
| C | 7.0473054 | 4.1629176 | 9.5480995  |
| H | 6.7486960 | 3.1163640 | 9.3841470  |
| H | 6.2691524 | 4.6177706 | 10.1840980 |
| C | 8.3978037 | 4.2346153 | 10.2693546 |
| H | 8.3650723 | 3.6845268 | 11.2218793 |
| H | 9.1727779 | 3.7470279 | 9.6520725  |
| C | 8.7737080 | 5.6970415 | 10.5351824 |
| H | 9.7449922 | 5.7659238 | 11.0495633 |
| H | 8.0203244 | 6.1351436 | 11.2106848 |
| C | 5.3909810 | 7.5820831 | 8.1292604  |
| H | 4.8561587 | 6.6307269 | 8.0165316  |
| H | 4.8118697 | 8.2544178 | 8.7750255  |
| O | 5.1986129 | 6.2144290 | 5.5781368  |
| N | 5.3767882 | 8.3351431 | 4.5853806  |

|   |            |            |           |
|---|------------|------------|-----------|
| N | 5.5317875  | 8.1689035  | 6.8138746 |
| C | 5.3556725  | 7.4345904  | 5.6517436 |
| C | 5.9197081  | 9.6268041  | 5.0522238 |
| H | 7.0244636  | 9.5677619  | 5.0306399 |
| C | 5.4707020  | 9.6114611  | 6.5321198 |
| H | 6.1965413  | 10.1510308 | 7.1555182 |
| C | 4.0503119  | 10.1696631 | 6.7650275 |
| H | 3.8861253  | 10.2959949 | 7.8461826 |
| H | 3.3199894  | 9.4227164  | 6.4125593 |
| C | 3.8010632  | 11.4858059 | 6.0199399 |
| H | 2.7753333  | 11.8334352 | 6.2166651 |
| H | 4.4764107  | 12.2728994 | 6.4007600 |
| C | 4.0345289  | 11.2928519 | 4.5183377 |
| H | 3.3321729  | 10.5333977 | 4.1352690 |
| H | 3.8247542  | 12.2222955 | 3.9670428 |
| C | 5.4785050  | 10.8566801 | 4.2548632 |
| H | 6.1536284  | 11.6803964 | 4.5448633 |
| H | 5.6655778  | 10.6825412 | 3.1840816 |
| C | 5.6174606  | 7.8422442  | 3.2399423 |
| H | 5.1327195  | 6.8577732  | 3.1838304 |
| H | 5.1562128  | 8.5218041  | 2.5115890 |
| O | 7.0483616  | 9.4949404  | 1.3354800 |
| N | 7.0196299  | 7.7405730  | 2.8795412 |
| N | 8.8690208  | 8.0472802  | 1.6500743 |
| C | 7.5825999  | 8.5352797  | 1.8963329 |
| C | 7.8727894  | 6.5769865  | 3.1633163 |
| H | 7.8734986  | 6.3576945  | 4.2403865 |
| C | 9.2559919  | 7.1308538  | 2.7410529 |
| H | 9.6548455  | 7.7303128  | 3.5814153 |
| C | 10.2949388 | 6.0690545  | 2.3702287 |
| H | 10.6806109 | 5.6592721  | 3.3193141 |
| H | 11.1546214 | 6.5551426  | 1.8831926 |
| C | 9.7449599  | 4.9166860  | 1.5237507 |
| H | 9.4552509  | 5.2839144  | 0.5249450 |
| H | 10.5342105 | 4.1654211  | 1.3671531 |
| C | 8.5246597  | 4.2904950  | 2.2068578 |
| H | 8.8183952  | 3.8908649  | 3.1937328 |
| H | 8.1449332  | 3.4364452  | 1.6253351 |
| C | 7.4145832  | 5.3354142  | 2.3682634 |
| H | 7.0935671  | 5.6635172  | 1.3654573 |
| H | 6.5348012  | 4.8995152  | 2.8643618 |
| C | 9.8322660  | 8.9096103  | 0.9933659 |
| H | 9.2679937  | 9.4856349  | 0.2464311 |
| H | 10.5971098 | 8.3055237  | 0.4884201 |
| O | 12.6978471 | 8.9650812  | 1.5038707 |
| N | 10.5473738 | 9.7971757  | 1.8958012 |
| N | 12.2921905 | 10.9005566 | 2.7678908 |
| C | 11.9260338 | 9.7894146  | 1.9975523 |
| C | 9.9929189  | 11.0438846 | 2.4427895 |
| H | 9.0482185  | 10.8430564 | 2.9681738 |
| C | 11.0964468 | 11.4165532 | 3.4631725 |
| H | 10.9334948 | 10.8159553 | 4.3795182 |
| C | 11.1431708 | 12.8969359 | 3.8481771 |
| H | 10.3169531 | 13.0645163 | 4.5601989 |
| H | 12.0667836 | 13.0980559 | 4.4129692 |
| C | 10.9747253 | 13.8588189 | 2.6682859 |
| H | 10.9487725 | 14.8952404 | 3.0386962 |
| H | 11.8437068 | 13.7859361 | 1.9929934 |
| C | 9.6980334  | 13.5267751 | 1.8884368 |
| H | 9.5515730  | 14.2352064 | 1.0589615 |
| H | 8.8212556  | 13.6366473 | 2.5507325 |
| C | 9.7677542  | 12.0978949 | 1.3378358 |
| H | 8.8504682  | 11.8420578 | 0.7876891 |
| H | 10.6058231 | 12.0372185 | 0.6231178 |
| C | 13.6141249 | 10.9435598 | 3.3572301 |
| H | 13.8628051 | 11.9787146 | 3.6228638 |
| H | 14.3126971 | 10.5839340 | 2.5896037 |
| O | 13.9303687 | 11.9068673 | 6.1029056 |
| N | 14.2515570 | 9.6601788  | 6.7022323 |
| N | 13.7698052 | 10.1498039 | 4.5683221 |

|    |            |            |            |
|----|------------|------------|------------|
| C  | 13.9756793 | 10.7098536 | 5.8070317  |
| C  | 13.8461690 | 8.3812506  | 6.0705168  |
| H  | 12.7574059 | 8.2462532  | 6.2126150  |
| C  | 14.0918839 | 8.7136425  | 4.5794567  |
| H  | 13.3852038 | 8.1633424  | 3.9443415  |
| C  | 15.5361844 | 8.4572882  | 4.1003029  |
| H  | 15.5643610 | 8.5349905  | 3.0030917  |
| H  | 16.1865192 | 9.2532006  | 4.5003863  |
| C  | 16.0782555 | 7.1008705  | 4.5647420  |
| H  | 17.1109891 | 6.9730846  | 4.2063223  |
| H  | 15.4884558 | 6.2823345  | 4.1160564  |
| C  | 16.0165640 | 7.0010911  | 6.0923444  |
| H  | 16.6407754 | 7.7958327  | 6.5348459  |
| H  | 16.4333684 | 6.0429611  | 6.4384636  |
| C  | 14.5698783 | 7.1327244  | 6.5773245  |
| H  | 13.9916728 | 6.2662682  | 6.2138805  |
| H  | 14.4977272 | 7.0856628  | 7.6746264  |
| C  | 14.0740867 | 9.9101685  | 8.1107819  |
| H  | 14.5946583 | 10.8424188 | 8.3592779  |
| H  | 14.5083274 | 9.0802306  | 8.6813753  |
| O  | 12.2221603 | 7.8449834  | 9.1044929  |
| N  | 12.6698778 | 10.0592288 | 8.5256255  |
| N  | 10.4977131 | 9.4588751  | 8.9105231  |
| C  | 11.9057031 | 9.0009693  | 8.8822154  |
| C  | 11.9945373 | 11.3496909 | 8.7367739  |
| H  | 12.2727627 | 12.0379237 | 7.9266990  |
| C  | 10.5063178 | 10.9525020 | 8.5972940  |
| H  | 10.2531114 | 10.9706591 | 7.5264995  |
| C  | 9.5036554  | 11.8388643 | 9.3398294  |
| H  | 9.3233070  | 12.7002085 | 8.6749617  |
| H  | 8.5348678  | 11.3207268 | 9.4201059  |
| C  | 9.9784888  | 12.3796109 | 10.6946213 |
| H  | 10.0109460 | 11.5765607 | 11.4521505 |
| H  | 9.2472642  | 13.1151926 | 11.0608011 |
| C  | 11.3712427 | 13.0060414 | 10.5752448 |
| H  | 11.3425573 | 13.8509010 | 9.8652547  |
| H  | 11.6962860 | 13.4203494 | 11.5408336 |
| C  | 12.3765963 | 11.9506946 | 10.1029495 |
| H  | 12.4140424 | 11.1388350 | 10.8504861 |
| H  | 13.3924519 | 12.3698874 | 10.0428377 |
| C  | 9.6671778  | 8.8495981  | 10.0366628 |
| H  | 10.0789895 | 9.0035616  | 7.8409858  |
| H  | 10.3756025 | 8.3083511  | 10.6760960 |
| H  | 9.1937891  | 9.6699081  | 10.5858100 |
| Cl | 9.7038224  | 8.6670282  | 6.2830815  |

### HCl@*i-cis-cyc*HC[6] HCl@1 A final coordinates in angstroms

140

|   |            |           |            |
|---|------------|-----------|------------|
| O | 6.9794180  | 9.2474500 | 10.0769196 |
| N | 9.0762022  | 8.2217370 | 9.9579095  |
| N | 7.2966615  | 7.1171870 | 9.1512293  |
| C | 7.7066191  | 8.3040975 | 9.7613892  |
| C | 9.5434445  | 6.8459434 | 9.7227713  |
| H | 10.5405087 | 6.8551933 | 9.2617897  |
| C | 8.4863131  | 6.3577881 | 8.7028472  |
| H | 8.7722248  | 6.7178472 | 7.6995567  |
| C | 8.3206038  | 4.8377095 | 8.6370678  |
| H | 9.1740935  | 4.4557508 | 8.0509145  |
| H | 7.4315933  | 4.5987075 | 8.0370144  |
| C | 8.3084126  | 4.1391634 | 9.9994015  |
| H | 8.2562839  | 3.0493791 | 9.8529946  |
| H | 7.4067156  | 4.4250285 | 10.5678345 |
| C | 9.5547901  | 4.5215448 | 10.8033077 |
| H | 9.5754710  | 3.9974440 | 11.7707656 |
| H | 10.4597386 | 4.2032041 | 10.2556516 |
| C | 9.5850281  | 6.0357161 | 11.0373657 |
| H | 10.4825506 | 6.3241437 | 11.6048386 |

|   |            |            |            |
|---|------------|------------|------------|
| H | 8.7102214  | 6.3144077  | 11.6481999 |
| C | 6.0295848  | 7.0807213  | 8.4558450  |
| H | 5.7695942  | 6.0261659  | 8.2850175  |
| H | 5.2804925  | 7.5345134  | 9.1161921  |
| O | 7.2494955  | 9.4798852  | 1.8791239  |
| N | 7.5585547  | 7.5394803  | 3.1734772  |
| N | 9.0667724  | 8.0459645  | 1.5623081  |
| C | 7.8953210  | 8.4734358  | 2.1514372  |
| C | 8.3352506  | 6.2920456  | 2.9103177  |
| H | 8.5474781  | 5.7952329  | 3.8666011  |
| C | 9.6249365  | 6.8922600  | 2.2989321  |
| H | 10.2625130 | 7.2738918  | 3.1155387  |
| C | 10.4571093 | 5.9183313  | 1.4618345  |
| H | 10.9842080 | 5.2624663  | 2.1753240  |
| H | 11.2489880 | 6.4773077  | 0.9419689  |
| C | 9.6325574  | 5.0501833  | 0.5086361  |
| H | 9.1774463  | 5.6731323  | -0.2796863 |
| H | 10.2920893 | 4.3309418  | -0.0001164 |
| C | 8.5306432  | 4.3217572  | 1.2829156  |
| H | 8.9870171  | 3.6617782  | 2.0413918  |
| H | 7.9442509  | 3.6716727  | 0.6162325  |
| C | 7.5928792  | 5.3293050  | 1.9597212  |
| H | 7.0859462  | 5.9165081  | 1.1750567  |
| H | 6.8107041  | 4.7975803  | 2.5206832  |
| C | 9.9079088  | 9.0095722  | 0.8572723  |
| H | 9.2379558  | 9.6243407  | 0.2430650  |
| H | 10.5987592 | 8.4564672  | 0.2090169  |
| O | 12.7053826 | 8.6908786  | 1.5312407  |
| N | 10.6922020 | 9.8585721  | 1.7265866  |
| N | 12.5303765 | 10.7504681 | 2.6460138  |
| C | 12.0498031 | 9.6566922  | 1.9260124  |
| C | 10.3007121 | 11.2138219 | 2.1478807  |
| H | 9.3076923  | 11.1958317 | 2.6174239  |
| C | 11.3894352 | 11.4997836 | 3.2101043  |
| H | 11.0855383 | 11.0095329 | 4.1541822  |
| C | 11.6437673 | 12.9821083 | 3.4929226  |
| H | 10.8151171 | 13.3277468 | 4.1346237  |
| H | 12.5525759 | 13.0836557 | 4.1046854  |
| C | 11.6907479 | 13.8616529 | 2.2399393  |
| H | 11.8012881 | 14.9160471 | 2.5355730  |
| H | 12.5749139 | 13.6098849 | 1.6306186  |
| C | 10.4239873 | 13.6620587 | 1.4013755  |
| H | 10.4321671 | 14.3154212 | 0.5158077  |
| H | 9.5384575  | 13.9506358 | 1.9950652  |
| C | 10.3094632 | 12.1988105 | 0.9584271  |
| H | 9.4014759  | 12.0439906 | 0.3561363  |
| H | 11.1705211 | 11.9580968 | 0.3136519  |
| C | 13.7962930 | 10.6349957 | 3.3513147  |
| H | 14.2067410 | 11.6387319 | 3.5199503  |
| H | 14.4677370 | 10.0686329 | 2.6922316  |
| O | 14.0271728 | 11.9119180 | 5.9426888  |
| N | 14.0268196 | 9.7512698  | 6.8565489  |
| N | 13.7084744 | 9.9899687  | 4.6495440  |
| C | 13.9297422 | 10.6888949 | 5.8268021  |
| C | 13.5292248 | 8.4486332  | 6.3761225  |
| H | 12.4267032 | 8.4354942  | 6.4771840  |
| C | 13.8769641 | 8.5445214  | 4.8702743  |
| H | 13.1463929 | 7.9795446  | 4.2745544  |
| C | 15.3087254 | 8.0812027  | 4.5249384  |
| H | 15.4034771 | 7.9997499  | 3.4317717  |
| H | 16.0161461 | 8.8593763  | 4.8557308  |
| C | 15.6838255 | 6.7584683  | 5.2034976  |
| H | 16.7134366 | 6.4831871  | 4.9292038  |
| H | 15.0342988 | 5.9444079  | 4.8351709  |
| C | 15.5382268 | 6.8829245  | 6.7235017  |
| H | 16.2175465 | 7.6700785  | 7.0916843  |
| H | 15.8378092 | 5.9489754  | 7.2231181  |
| C | 14.0905253 | 7.2186185  | 7.0938512  |
| H | 13.4473166 | 6.3668499  | 6.8129771  |
| H | 13.9618793 | 7.3416076  | 8.1801592  |

|    |            |            |            |
|----|------------|------------|------------|
| C  | 13.8554451 | 10.1866427 | 8.2307723  |
| H  | 14.3564602 | 11.1609902 | 8.3100952  |
| H  | 14.3398947 | 9.4682044  | 8.9044249  |
| O  | 12.5137941 | 8.5121423  | 10.1775077 |
| N  | 12.4714248 | 10.2932726 | 8.6622735  |
| N  | 10.7258292 | 10.0251373 | 10.0462971 |
| C  | 11.9670061 | 9.4990994  | 9.6820015  |
| C  | 11.6490380 | 11.5035636 | 8.5024580  |
| H  | 11.5777570 | 11.7807052 | 7.4412557  |
| C  | 10.2838867 | 10.9819292 | 9.0148806  |
| H  | 9.7963991  | 10.4160289 | 8.1970303  |
| C  | 9.3169103  | 12.0681650 | 9.4918529  |
| H  | 8.8909688  | 12.5329408 | 8.5862819  |
| H  | 8.4670137  | 11.5967473 | 10.0086397 |
| C  | 9.9706288  | 13.1609446 | 10.3429938 |
| H  | 10.3112024 | 12.7411345 | 11.3042863 |
| H  | 9.2253689  | 13.9347458 | 10.5821341 |
| C  | 11.1670350 | 13.7677450 | 9.6025679  |
| H  | 10.8235257 | 14.2255755 | 8.6580146  |
| H  | 11.6237748 | 14.5771395 | 10.1923006 |
| C  | 12.2166213 | 12.6877329 | 9.3148410  |
| H  | 12.5957078 | 12.3014236 | 10.2754656 |
| H  | 13.0744869 | 13.1114514 | 8.7721816  |
| C  | 9.7900966  | 9.1874685  | 10.7761220 |
| H  | 10.3728138 | 8.6672281  | 11.5476157 |
| H  | 9.0352409  | 9.8245915  | 11.2542071 |
| O  | 6.8923965  | 6.0295209  | 5.9301419  |
| N  | 5.8497346  | 7.8522072  | 4.9368706  |
| N  | 5.9838061  | 7.8029750  | 7.1751575  |
| C  | 6.3066033  | 7.1118167  | 6.0101550  |
| C  | 5.2336727  | 9.1130502  | 5.3742171  |
| H  | 4.2954165  | 9.2827292  | 4.8205030  |
| C  | 4.8965059  | 8.7606983  | 6.8503761  |
| H  | 3.9414852  | 8.1962862  | 6.8491283  |
| C  | 4.7220251  | 9.9663372  | 7.7799335  |
| H  | 4.8042721  | 9.6395561  | 8.8265267  |
| H  | 3.6855886  | 10.3200359 | 7.6399679  |
| C  | 5.6811465  | 11.1317291 | 7.5227486  |
| H  | 6.6967037  | 10.8465591 | 7.8373889  |
| H  | 5.3853726  | 11.9820859 | 8.1559266  |
| C  | 5.6891535  | 11.5224977 | 6.0429828  |
| H  | 6.3549591  | 12.3815712 | 5.8697601  |
| H  | 4.6790924  | 11.8429475 | 5.7294678  |
| C  | 6.1576976  | 10.3304283 | 5.2039879  |
| H  | 6.2242738  | 10.5795634 | 4.1344039  |
| H  | 7.1706475  | 10.0512809 | 5.5321195  |
| Cl | 9.5007843  | 8.6133991  | 5.4453077  |
| H  | 8.5874039  | 8.1977588  | 4.5451432  |
| C  | 6.1350006  | 7.4668430  | 3.5782395  |
| H  | 5.5714658  | 8.1354896  | 2.9148148  |
| H  | 5.8013667  | 6.4314958  | 3.4296106  |

### HCl@*i-cis-cyc*HC[6] HCl@1 B final coordinates in angstroms

140

|   |            |           |            |
|---|------------|-----------|------------|
| O | 7.0959949  | 8.9546217 | 10.4103644 |
| N | 9.2379023  | 8.1406058 | 9.9489221  |
| N | 7.4652529  | 6.9798968 | 9.2015439  |
| C | 7.8497460  | 8.1206036 | 9.9053010  |
| C | 9.7747878  | 6.8399875 | 9.5158225  |
| H | 10.7115804 | 6.9781891 | 8.9581753  |
| C | 8.6495515  | 6.3702679 | 8.5605332  |
| H | 8.7994082  | 6.8519458 | 7.5762708  |
| C | 8.5917919  | 4.8549632 | 8.3450880  |
| H | 9.4064998  | 4.6101280 | 7.6423008  |
| H | 7.6644246  | 4.6054806 | 7.8112741  |
| C | 8.7772373  | 4.0248414 | 9.6171214  |
| H | 8.7876991  | 2.9546897 | 9.3585598  |



H 7.9237471 4.1765314 10.2993732  
C 10.0720137 4.4256976 10.3289900  
H 10.2342073 3.8123995 11.2286229  
H 10.9329071 4.2384881 9.6632282  
C 10.0196813 5.9057524 10.7207520  
H 10.9510846 6.2100923 11.2209085  
H 9.1993809 6.0474047 11.4445781  
C 6.1328768 6.8919956 8.6357704  
H 5.8952176 5.8293579 8.4877783  
H 5.4453543 7.3213618 9.3757195  
O 6.9013693 9.2097189 2.1947601  
N 6.8084475 7.1070982 3.2210503  
N 8.6037349 7.6169364 1.9878299  
C 7.3753790 8.1002586 2.4478693  
C 7.5345231 5.8360788 3.0406573  
H 7.5526882 5.2874614 3.9908351  
C 8.9479460 6.3613282 2.6881582  
H 9.4638401 6.6090373 3.6325504  
C 9.8269317 5.3809302 1.9063252  
H 10.2064100 4.6486409 2.6392441  
H 10.7190120 5.9061334 1.5311774  
C 9.0999346 4.6253962 0.7904768  
H 8.8078423 5.3200724 -0.0148510  
H 9.7830603 3.8894445 0.3394898  
C 7.8483158 3.9374832 1.3451792  
H 8.1400191 3.2116365 2.1240649  
H 7.3361365 3.3631930 0.5583338  
C 6.8892652 4.9816460 1.9274026  
H 6.5642453 5.6513715 1.1137564  
H 5.9834015 4.4979689 2.3244971  
C 9.5624056 8.5281070 1.4311216  
H 9.0309262 9.1729264 0.7218443  
H 10.3374543 7.9576308 0.9047398  
O 12.3565396 8.3583242 2.0113149  
N 10.2794400 9.3953892 2.4106973  
N 12.1922182 10.5109338 2.9016865  
C 11.7090413 9.3270010 2.3911363  
C 9.9098274 10.8365458 2.5614667  
H 8.9617284 10.9100685 3.1110877  
C 11.0883850 11.3385804 3.4320167  
H 10.9075829 11.0461446 4.4807156  
C 11.3225327 12.8497732 3.3914838  
H 10.5396275 13.3055912 4.0213449  
H 12.2727028 13.0800603 3.8965013  
C 11.2427757 13.4573577 1.9900622  
H 11.3494057 14.5504977 2.0553284  
H 12.0790355 13.0966738 1.3669432  
C 9.9145609 13.0793819 1.3293824  
H 9.8276187 13.5342348 0.3311894  
H 9.0772077 13.4786391 1.9282393  
C 9.7886160 11.5560884 1.2039060  
H 8.8256123 11.2922015 0.7432915  
H 10.5845692 11.1943937 0.5310446  
C 13.5455758 10.5580324 3.4514071  
H 13.8664364 11.6059532 3.4981457  
H 14.1879452 10.0064325 2.7526516  
O 13.7425559 12.0236550 5.9407126  
N 14.1080598 9.9467380 6.9735171  
N 13.6618715 9.9992208 4.7782587  
C 13.8259142 10.7946200 5.9026642  
C 13.7797531 8.5574662 6.5919345  
H 12.6963191 8.4007736 6.7500426  
C 14.0402346 8.6062759 5.0669172  
H 13.3675121 7.9113154 4.5457518  
C 15.5062821 8.3282392 4.6690691  
H 15.5637676 8.1953128 3.5776829  
H 16.1096038 9.2164268 4.9196917  
C 16.0987896 7.1149861 5.3952988  
H 17.1440376 6.9718137 5.0815091  
H 15.5571027 6.1968802 5.1064812

C 16.0052813 7.3105073 6.9120758  
H 16.5816360 8.2056421 7.2010812  
H 16.4575370 6.4593936 7.4435201  
C 14.5428519 7.4621147 7.3401078  
H 14.0150819 6.5147689 7.1345110  
H 14.4409100 7.6245106 8.4236243  
C 13.9229625 10.4342145 8.3300541  
H 14.3272883 11.4547938 8.3543319  
H 14.4941129 9.7964462 9.0163419  
O 12.7080699 8.5701273 10.1860193  
N 12.5451461 10.4397672 8.7923509  
N 10.8326306 9.9800260 10.1669211  
C 12.0979359 9.5526058 9.7603720  
C 11.6570961 11.6120548 8.7219208  
H 11.5587882 11.9533050 7.6820987  
C 10.3288069 10.9866981 9.2148737  
H 9.8559770 10.4587631 8.3639918  
C 9.3177778 11.9836880 9.7860614  
H 8.8487099 12.4892797 8.9251416  
H 8.5046165 11.4335145 10.2839267  
C 9.9317324 13.0449015 10.7037115  
H 10.3144131 12.5760198 11.6257667  
H 9.1525643 13.7583116 11.0121974  
C 11.0776868 13.7665441 9.9878005  
H 10.6904703 14.2698050 9.0841913  
H 11.5039328 14.5564196 10.6252040  
C 12.1757992 12.7667616 9.6068437  
H 12.5936935 12.3361963 10.5316310  
H 13.0000748 13.2740519 9.0836272  
C 9.9496361 9.0437319 10.8397991  
H 10.5771263 8.4756879 11.5396241  
H 9.1866599 9.5994774 11.3995788  
O 6.4142758 5.6957446 6.0537566  
N 5.3900063 7.5949442 5.1779150  
N 5.9352388 7.5870477 7.3586477  
C 5.9657370 6.8379923 6.1790501  
C 5.0694876 8.9448225 5.6636900  
H 4.0956154 9.2675897 5.2613229  
C 4.9317318 8.6654470 7.1829393  
H 3.9281564 8.2242869 7.3570461  
C 5.0623841 9.8996125 8.0784098  
H 5.2283067 9.5866946 9.1196675  
H 4.0831100 10.4082307 8.0508667  
C 6.1470898 10.8924966 7.6506410  
H 7.1414162 10.4536304 7.8300793  
H 6.0808487 11.7890249 8.2849971  
C 6.0119452 11.2507787 6.1690355  
H 6.7798373 11.9814466 5.8722219  
H 5.0351565 11.7353936 5.9868009  
C 6.1475824 9.9854638 5.3168798  
H 6.0982596 10.2061863 4.2413565  
H 7.1372791 9.5366674 5.4995304  
C 5.4716029 7.2025459 3.7778880  
H 4.9912198 6.2198190 3.6682690  
H 4.9066156 7.9455860 3.1994985  
Cl 9.9179562 8.5918850 5.3808491  
H 10.0316018 8.8628628 4.0471877

HCl@*i-cis-cyc*HC[6] HCl@1 C final  
coordinates in angstroms

140

O 7.0683256 9.2301890 10.1858225  
N 9.1236483 8.1535560 9.9090986  
N 7.3053315 7.2498783 8.9518339  
C 7.7567853 8.3155958 9.7275988  
C 9.5357999 6.8058316 9.4843093  
H 10.5323159 6.8389645 9.0233479  
C 8.4603469 6.5010179 8.4126482

|   |            |            |            |    |            |            |            |
|---|------------|------------|------------|----|------------|------------|------------|
| H | 8.7702772  | 6.9767984  | 7.4636463  | H  | 12.7024987 | 8.2015204  | 6.8958074  |
| C | 8.2310697  | 5.0097868  | 8.1484189  | C  | 13.8399895 | 8.6239250  | 5.0913230  |
| H | 9.0737280  | 4.6724506  | 7.5202636  | H  | 13.2294552 | 7.8576783  | 4.5945749  |
| H | 7.3365069  | 4.8916179  | 7.5225066  | C  | 15.2863839 | 8.5717569  | 4.5633300  |
| C | 8.1844987  | 4.1405573  | 9.4075185  | H  | 15.2649351 | 8.4684602  | 3.4689380  |
| H | 8.0823828  | 3.0832101  | 9.1185568  | H  | 15.7904518 | 9.5262878  | 4.7918402  |
| H | 7.2958785  | 4.3897104  | 10.0120990 | C  | 16.1010148 | 7.4313986  | 5.1861845  |
| C | 9.4456773  | 4.3565439  | 10.2484955 | H  | 17.1219766 | 7.4485035  | 4.7762017  |
| H | 9.4422547  | 3.7113900  | 11.1402702 | H  | 15.6664938 | 6.4574143  | 4.9007516  |
| H | 10.3355281 | 4.0721071  | 9.6592413  | C  | 16.1207467 | 7.5568716  | 6.7119135  |
| C | 9.5425782  | 5.8238899  | 10.6778064 | H  | 16.5981076 | 8.5103704  | 6.9955169  |
| H | 10.4512917 | 5.9951285  | 11.2738292 | H  | 16.7270346 | 6.7562312  | 7.1614729  |
| H | 8.6809933  | 6.0565794  | 11.3256016 | C  | 14.6950967 | 7.4911018  | 7.2627297  |
| C | 6.0259254  | 7.3286478  | 8.2739782  | H  | 14.2791900 | 6.4898961  | 7.0573780  |
| H | 5.6601575  | 6.3049871  | 8.1137147  | H  | 14.6630736 | 7.5985122  | 8.3570576  |
| H | 5.3443599  | 7.8601344  | 8.9510564  | C  | 13.8559903 | 10.3539600 | 8.4247943  |
| O | 7.0123256  | 9.3921003  | 1.5105699  | H  | 14.3111583 | 11.3518984 | 8.4642139  |
| N | 7.0597213  | 7.4917733  | 2.8732016  | H  | 14.4414922 | 9.6586349  | 9.0386083  |
| N | 8.7769958  | 7.8457681  | 1.4750079  | O  | 12.5754750 | 8.3734000  | 10.1000403 |
| C | 7.5517186  | 8.3585139  | 1.9120329  | N  | 12.5144220 | 10.4103109 | 8.9596245  |
| C | 7.8646659  | 6.2571240  | 2.9108962  | N  | 10.7974972 | 9.8949676  | 10.3040762 |
| H | 7.9413468  | 5.8919440  | 3.9428461  | C  | 12.0222828 | 9.4378981  | 9.8188987  |
| C | 9.2256925  | 6.7986476  | 2.4166104  | C  | 11.7007269 | 11.6348181 | 9.0428479  |
| H | 9.7345981  | 7.2876317  | 3.2682125  | H  | 11.6112204 | 12.1005460 | 8.0520048  |
| C | 10.1637431 | 5.7396851  | 1.8335496  | C  | 10.3437423 | 11.0340810 | 9.4812599  |
| H | 10.5915895 | 5.1926819  | 2.6912556  | H  | 9.8368872  | 10.6339972 | 8.5828037  |
| H | 11.0186827 | 6.2367126  | 1.3513045  | C  | 9.3992150  | 12.0170660 | 10.1757025 |
| C | 9.4771827  | 4.7363867  | 0.9027198  | H  | 8.9611127  | 12.6474628 | 9.3832522  |
| H | 9.1301898  | 5.2430350  | -0.0138106 | H  | 8.5527499  | 11.4633151 | 10.6089920 |
| H | 10.2028802 | 3.9718299  | 0.5855456  | C  | 10.0826477 | 12.9232111 | 11.2028918 |
| C | 8.2802937  | 4.0897190  | 1.6077153  | H  | 10.4404152 | 12.3268081 | 12.0591702 |
| H | 8.6290015  | 3.5459845  | 2.5034469  | H  | 9.3519919  | 13.6425897 | 11.6031499 |
| H | 7.7982835  | 3.3429534  | 0.9580833  | C  | 11.2674794 | 13.6532974 | 10.5621834 |
| C | 7.2586776  | 5.1612352  | 2.0066810  | H  | 10.9073865 | 14.2820314 | 9.7288038  |
| H | 6.8703463  | 5.6355715  | 1.0900233  | H  | 11.7455306 | 14.3347262 | 11.2825698 |
| H | 6.4010292  | 4.7051319  | 2.5239141  | C  | 12.2980334 | 12.6399434 | 10.0519215 |
| C | 9.7123022  | 8.7325481  | 0.8107964  | H  | 12.6924615 | 12.0767575 | 10.9139390 |
| H | 9.1450492  | 9.2926115  | 0.0569544  | H  | 13.1520936 | 13.1541412 | 9.5848437  |
| H | 10.4770252 | 8.1222227  | 0.3136020  | C  | 9.8604545  | 8.9451958  | 10.8802179 |
| O | 12.3813554 | 8.4727204  | 1.9604338  | H  | 10.4453070 | 8.2841951  | 11.5328920 |
| N | 10.3946924 | 9.6791642  | 1.6827811  | H  | 9.1235785  | 9.4947744  | 11.4799578 |
| N | 12.0885142 | 10.6459476 | 2.7780018  | O  | 6.3044002  | 6.0390721  | 5.7412937  |
| C | 11.6893475 | 9.4808375  | 2.1180003  | N  | 5.5838301  | 8.0281222  | 4.7688743  |
| C | 10.0099826 | 11.0938131 | 1.8294643  | N  | 6.0263134  | 8.0155160  | 6.9753696  |
| H | 8.9515197  | 11.1673344 | 2.1140500  | C  | 6.0076294  | 7.2340309  | 5.8161613  |
| C | 10.9190968 | 11.5191092 | 3.0110823  | C  | 5.4391468  | 9.4246590  | 5.1980903  |
| H | 10.4259804 | 11.2085260 | 3.9494942  | H  | 4.5353284  | 9.8636549  | 4.7452529  |
| C | 11.2122201 | 13.0193263 | 3.0963227  | C  | 5.2087458  | 9.2269780  | 6.7198789  |
| H | 10.3138654 | 13.4900074 | 3.5303946  | H  | 4.1442352  | 8.9519574  | 6.8679653  |
| H | 12.0153920 | 13.1947111 | 3.8286034  | C  | 5.4986725  | 10.4579752 | 7.5813020  |
| C | 11.5119467 | 13.6851820 | 1.7504598  | H  | 5.5816885  | 10.1593924 | 8.6370021  |
| H | 11.6323538 | 14.7695273 | 1.8959959  | H  | 4.6094363  | 11.1080147 | 7.5052413  |
| H | 12.4671383 | 13.3125258 | 1.3444088  | C  | 6.7321135  | 11.2612256 | 7.1588063  |
| C | 10.3877800 | 13.3914037 | 0.7519346  | H  | 7.6466454  | 10.6854052 | 7.3761970  |
| H | 10.5755478 | 13.8950151 | -0.2086164 | H  | 6.7848226  | 12.1783190 | 7.7644838  |
| H | 9.4359652  | 13.7967437 | 1.1371106  | C  | 6.6908101  | 11.5895905 | 5.6644834  |
| C | 10.2665857 | 11.8801299 | 0.5249565  | H  | 7.5661257  | 12.1903055 | 5.3739993  |
| H | 9.4614758  | 11.6573060 | -0.1911321 | H  | 5.8006480  | 12.2046860 | 5.4394343  |
| H | 11.2059207 | 11.5159891 | 0.0765269  | C  | 6.6622523  | 10.2918942 | 4.8514342  |
| C | 13.2898988 | 10.6472054 | 3.5620783  | H  | 6.6610428  | 10.4872979 | 3.7688851  |
| H | 13.5811463 | 11.6837979 | 3.7709808  | H  | 7.5765938  | 9.7188591  | 5.0699144  |
| H | 14.0691869 | 10.1553187 | 2.9685617  | C  | 5.7056299  | 7.5873310  | 3.3876395  |
| O | 13.4210854 | 11.9788873 | 6.0859025  | H  | 5.2283263  | 6.5999341  | 3.3146562  |
| N | 13.9301242 | 9.9074560  | 7.0347207  | H  | 5.1618504  | 8.3029822  | 2.7570639  |
| N | 13.2073239 | 9.9629509  | 4.8855689  | H  | 11.5876979 | 9.5397397  | 5.2541451  |
| C | 13.5274018 | 10.7586361 | 6.0317482  | Cl | 10.3621109 | 9.0821241  | 5.6578472  |
| C | 13.7317608 | 8.4981572  | 6.6318618  |    |            |            |            |

## Complexation

### General information

$^{19}\text{F}$  NMR was recorded on Bruker Avance III 400 MHz spectrometer using a Bruker BBO probe equipped with a z-gradient coil.

### Determination of the stoichiometry of the complexes

The stoichiometry of the complexes of trifluoroacetic acid (TFA) with ureas **1**, **2**, **6** and **7** were determined by Job's method using  $^{19}\text{F}$ - and  $^1\text{H}$ -NMR spectroscopy. The experiments were conducted for binary systems of the host [H] urea and a guest [G] TFA, where the total concentration of [H]+[G] was held constant (5 mM or 1.7 mM), and the relative proportions of [H] and [G] were varied from [H]/[G] = 1 to [H]/[G] = 0. The  $^{19}\text{F}$ - and  $^1\text{H}$ -NMR data for the Job plots was measured in deuterated chloroform at room temperature using a Bruker Avance III 400 MHz spectrometer. The Job plots were drawn by following the chemical shift of the TFA fluorine signal or *i-cis*-cycHC[6] **1** proton signals ( $\delta_{1\text{at}}$  at 3.1 ppm and  $\alpha_{10}$  at 4.6 ppm) while varying the [H]/[G] ratio. The maximum shift change was seen at  $\alpha = 0.5$  of the Job plot curve for mono-urea **7**, indicating a 1:1 molecular association. Following  $^{19}\text{F}$  signal of TFA in 5mM solutions, the concentration maximum shift change was seen at  $\alpha = 0.7$  of the Job plot curve for all cycHCs **1**, **2**, **6**. Following the  $^1\text{H}$  signals of *i-cis*-cycHC[6] **1** during Job's analysis in 5mM concentration, maximum shift change was seen at  $\alpha = 0.3$ .  $^{19}\text{F}$  and  $^1\text{H}$  measurements were in agreement indicating 1:2 stoichiometry of complexes, where two TFA molecules form complex with one cycHC[6]. In 1.7 mM solutions maximum shift change moved toward  $\alpha = 0.5$ , but did not reached it, reflecting higher proportion of 1:1 complex in presence of 1:2 complex (Figure S14).

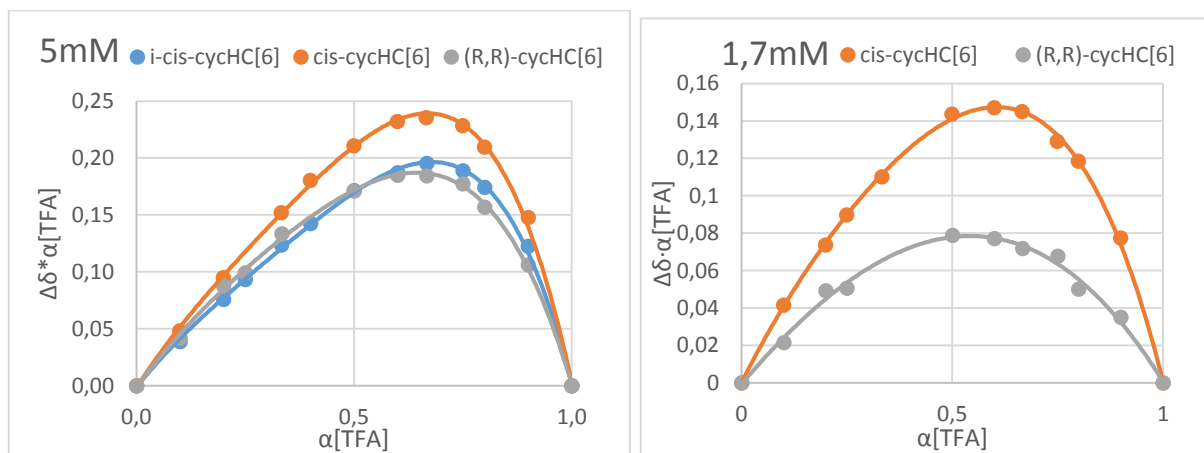

**Figure S14.** Job plots for 5 mM and 1.7 mM solutions of *i-cis*-cycHC[6] **1**, *cis*-cycHC[6] **2** and (*R,R*)-cycHC[6] **6** with TFA.

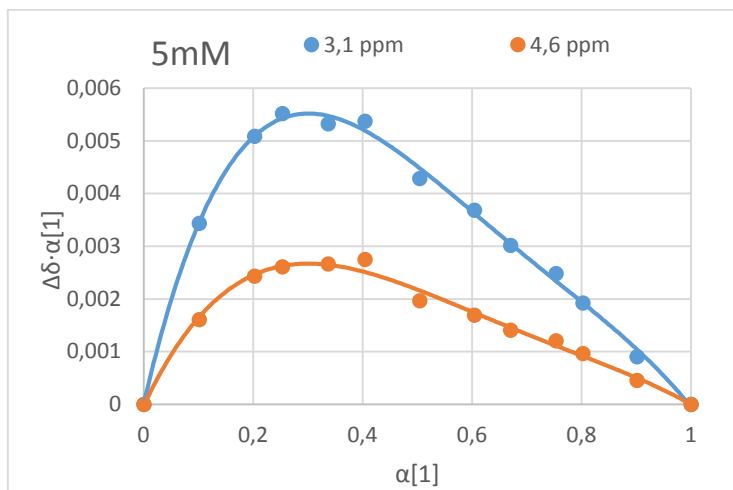

**Figure S15.** Job plot for 5 mM solutions of **1** with TFA, following protons of **1** protons at 3,1 ppm ( $\delta_1$ ) and 4,6 ppm ( $\alpha_{10}$ ) by  $^1\text{H-NMR}$  (see S3-S7 for assignment)

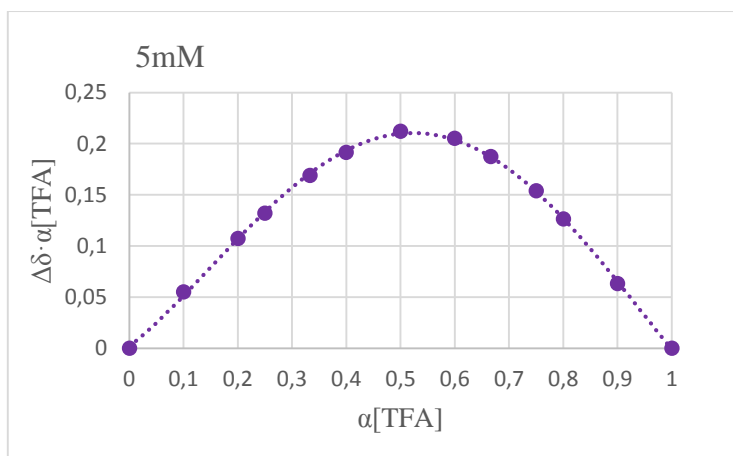

**Figure S16.** Job plot for 5 mM solutions of monourea **7** with TFA, following TFA by  $^{19}\text{F-NMR}$ .

### Determination of the association constants

#### General remarks

$^{19}\text{F-NMR}$  titration experiments were conducted in deuterated chloroform at 297 K. The concentration of TFA solution in the beginning of titration was in between 0,97 to 1,75 mM and urea derivatives **1**, **2**, **6**, **7** and **8** stock solution in between 70 to 33 mM. Urea was added by syringe in small portions and the spectra recorded after each addition, resulting in a set of spectra (15-18 per titration). The  $^{19}\text{F-NMR}$  spectra were recorded on a Bruker Avance II 400MHz spectrometer using regular 5 mm NMR tubes. The progressive changes of the chemical shifts of TFA were followed. In order to avoid interactions with chemical shift reference compound,  $^{19}\text{F}$  TFA chemical

Binding of TFA to cycHC[6]s can be expressed as follows:

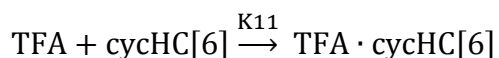

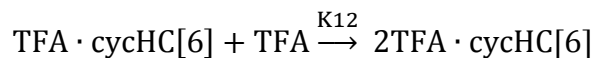

Binding of TFA to monoureas **7** and **8** can be expressed as follows:

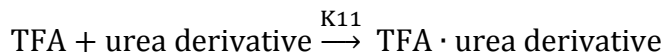

Association constants  $K_{11}$  and  $K_{12}$  were calculated using free online tool BindFit from <http://supramolecular.org/> (accessed March 22, 2018).

**Table S6.** Association constants  $K$  of urea derivatives **1**, **2**, **6**, **7**, **8** with TFA, determined by  $^{19}\text{F}$ -NMR titration in  $\text{CDCl}_3$ .

| No | Urea derivative | $K_{11}$ ( $\text{M}^{-1}$ ) | error (%) | $K_{12}$ ( $\text{M}^{-1}$ ) | error (%) | $K_{\text{tot}}$ | error (%) |
|----|-----------------|------------------------------|-----------|------------------------------|-----------|------------------|-----------|
| 1  | <b>1</b>        | $8.8 \cdot 10^2$             | 8.3       | $7.6 \cdot 10^2$             | 11        | $6.7 \cdot 10^5$ | 14        |
| 2  | <b>2</b>        | $7.3 \cdot 10^2$             | 9.8       | $16 \cdot 10^2$              | 9.4       | $1.2 \cdot 10^6$ | 14        |
| 3  | <b>6</b>        | $2.8 \cdot 10^2$             | 3.7       | $6.3 \cdot 10^2$             | 2.9       | $1.8 \cdot 10^5$ | 4.7       |
| 4  | <b>7</b>        | $43 \cdot 10^2$              | 11        |                              |           |                  |           |
| 5  | <b>8</b>        | $21 \cdot 10^2$              | 8.1       |                              |           |                  |           |

**Table S7.** Titration data of TFA with urea derivatives.

| TFA / M | ( <i>R,R</i> )-cycHC[6] <b>6</b> / M | $\delta$ ( $^{19}\text{F}$ ) of TFA |
|---------|--------------------------------------|-------------------------------------|
| 0.00175 | 0.00000                              | -75.444                             |
| 0.00173 | 0.00064                              | -75.579                             |
| 0.00172 | 0.00127                              | -75.660                             |
| 0.00171 | 0.00171                              | -75.696                             |
| 0.00170 | 0.00216                              | -75.723                             |
| 0.00168 | 0.00276                              | -75.750                             |
| 0.00167 | 0.00335                              | -75.768                             |
| 0.00165 | 0.00393                              | -75.782                             |
| 0.00163 | 0.00485                              | -75.799                             |
| 0.00159 | 0.00639                              | -75.816                             |
| 0.00154 | 0.00836                              | -75.829                             |
| 0.00149 | 0.01047                              | -75.835                             |
| 0.00140 | 0.01406                              | -75.839                             |
| 0.00127 | 0.01917                              | -75.839                             |
| 0.00117 | 0.02343                              | -75.839                             |

| TFA / M | <i>cis</i> -cycHC[6] <b>2</b> / M | $\delta$ ( $^{19}\text{F}$ ) of TFA |
|---------|-----------------------------------|-------------------------------------|
| 0.00097 | 0.00000                           | -75.347                             |

|         |         |         |
|---------|---------|---------|
| 0.00096 | 0.00022 | -75.476 |
| 0.00096 | 0.00043 | -75.563 |
| 0.00095 | 0.00064 | -75.624 |
| 0.00094 | 0.00096 | -75.683 |
| 0.00093 | 0.00126 | -75.722 |
| 0.00092 | 0.00166 | -75.756 |
| 0.00091 | 0.00210 | -75.781 |
| 0.00089 | 0.00258 | -75.801 |
| 0.00087 | 0.00326 | -75.820 |
| 0.00085 | 0.00416 | -75.836 |
| 0.00082 | 0.00509 | -75.848 |
| 0.00077 | 0.00675 | -75.861 |
| 0.00070 | 0.00911 | -75.872 |
| 0.00064 | 0.01108 | -75.877 |
| 0.00058 | 0.01305 | -75.877 |
| 0.00054 | 0.01469 | -75.880 |

| TFA / M | <i>i-cis-cyc</i> HC[6] <b>1</b> / M | $\delta$ ( $^{19}\text{F}$ ) of TFA |
|---------|-------------------------------------|-------------------------------------|
| 0.00174 | 0.00000                             | -75.501                             |
| 0.00172 | 0.00069                             | -75.670                             |
| 0.00170 | 0.00137                             | -75.751                             |
| 0.00168 | 0.00204                             | -75.797                             |
| 0.00166 | 0.00301                             | -75.828                             |
| 0.00164 | 0.00396                             | -75.848                             |
| 0.00161 | 0.00488                             | -75.861                             |
| 0.00158 | 0.00636                             | -75.872                             |
| 0.00153 | 0.00833                             | -75.882                             |
| 0.00148 | 0.01043                             | -75.887                             |
| 0.00139 | 0.01400                             | -75.896                             |
| 0.00126 | 0.01909                             | -75.901                             |
| 0.00116 | 0.02333                             | -75.904                             |
| 0.00105 | 0.02758                             | -75.905                             |
| 0.00096 | 0.03111                             | -75.905                             |

| TFA / M | Monourea <b>7</b> / M | $\delta$ ( $^{19}\text{F}$ ) of TFA |
|---------|-----------------------|-------------------------------------|
| 0.00097 | 0.00000               | -75.358                             |
| 0.00096 | 0.00030               | -75.538                             |
| 0.00096 | 0.00059               | -75.674                             |
| 0.00095 | 0.00088               | -75.769                             |
| 0.00094 | 0.00131               | -75.854                             |
| 0.00093 | 0.00173               | -75.903                             |

|         |         |         |
|---------|---------|---------|
| 0.00092 | 0.00228 | -75.941 |
| 0.00091 | 0.00288 | -75.945 |
| 0.00089 | 0.00352 | -75.982 |
| 0.00087 | 0.00446 | -75.998 |
| 0.00085 | 0.00570 | -76.01  |
| 0.00082 | 0.00697 | -76.011 |
| 0.00077 | 0.00923 | -76.027 |
| 0.00070 | 0.01246 | -76.033 |
| 0.00064 | 0.01516 | -76.036 |
| 0.00058 | 0.01786 | -76.038 |
| 0.00054 | 0.02011 | -76.038 |
| 0.00050 | 0.02201 | -76.038 |

| TFA / M | Monourea <b>8</b> / M | $\delta$ ( $^{19}\text{F}$ ) of TFA |
|---------|-----------------------|-------------------------------------|
| 0.00097 | 0.00000               | -75.410                             |
| 0.00096 | 0.00031               | -75.542                             |
| 0.00096 | 0.00061               | -75.647                             |
| 0.00095 | 0.00092               | -75.725                             |
| 0.00094 | 0.00136               | -75.804                             |
| 0.00093 | 0.00180               | -75.854                             |
| 0.00092 | 0.00237               | -75.859                             |
| 0.00091 | 0.00299               | -75.925                             |
| 0.00089 | 0.00366               | -75.946                             |
| 0.00087 | 0.00463               | -75.965                             |
| 0.00085 | 0.00592               | -75.981                             |
| 0.00082 | 0.00724               | -75.992                             |
| 0.00077 | 0.00959               | -76.004                             |
| 0.00070 | 0.01294               | -76.012                             |
| 0.00064 | 0.01574               | -76.017                             |
| 0.00058 | 0.01854               | -76.019                             |
| 0.00054 | 0.02088               | -76.021                             |
| 0.00050 | 0.02286               | -76.021                             |

*(R,R)*-cycHC[6] **6**+TFA

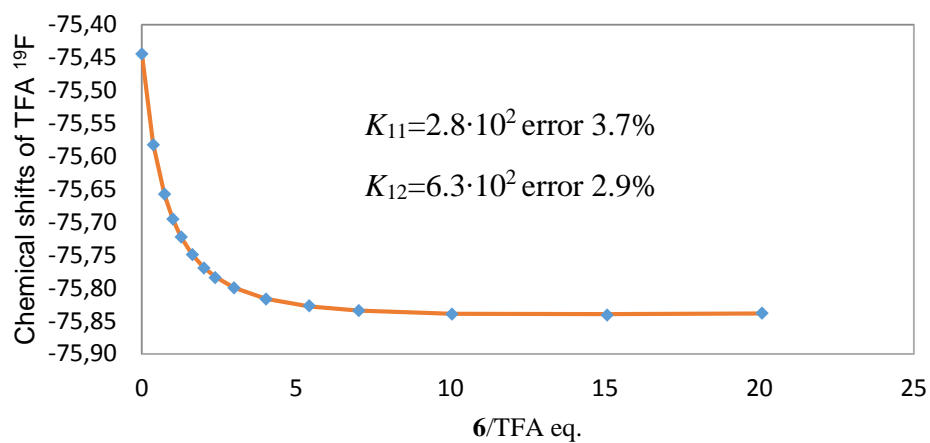

*cis*-cycHC[6] **2**+TFA

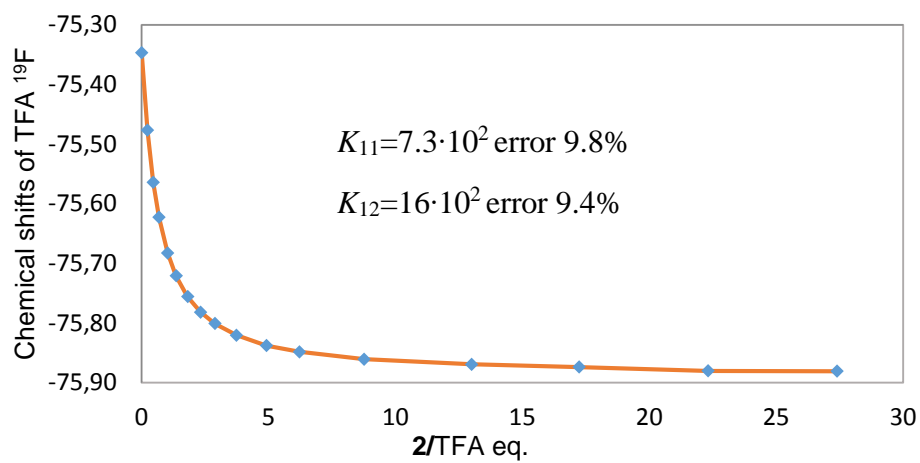



*i-cis-cycHC[6] 1 +TFA*

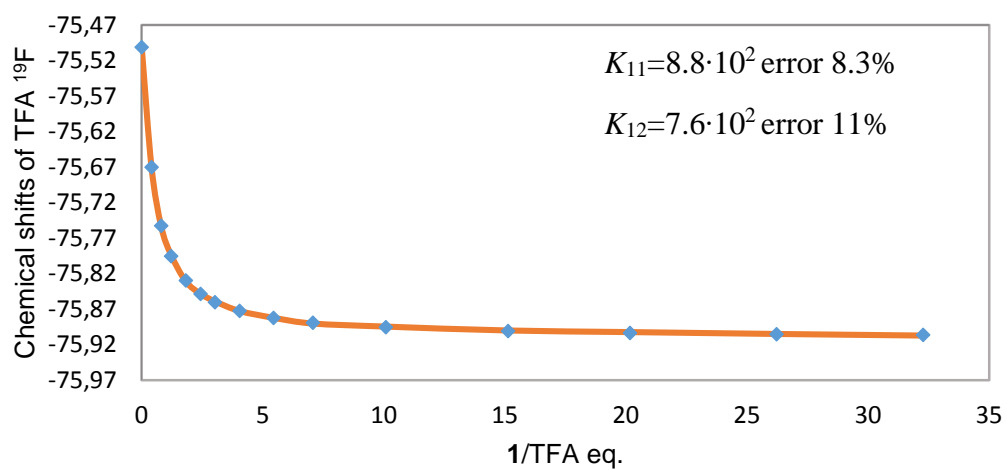

**7+TFA**

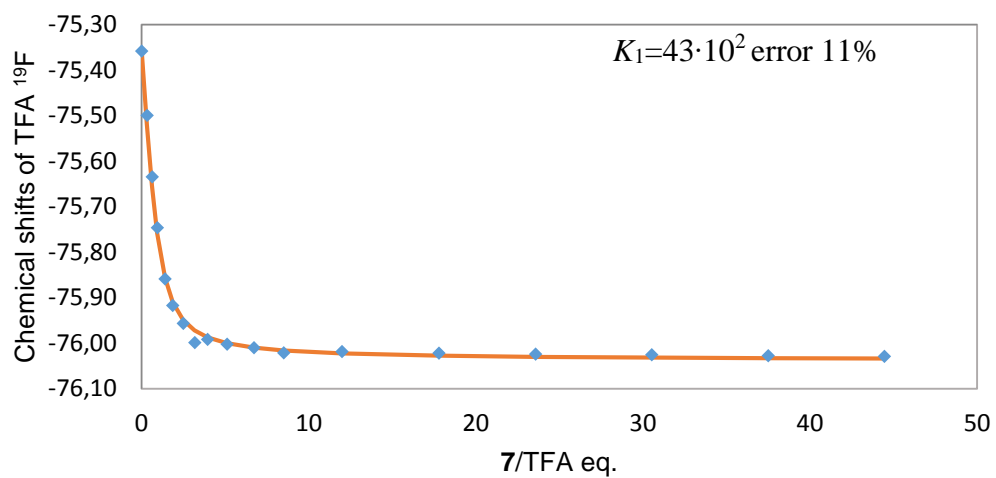

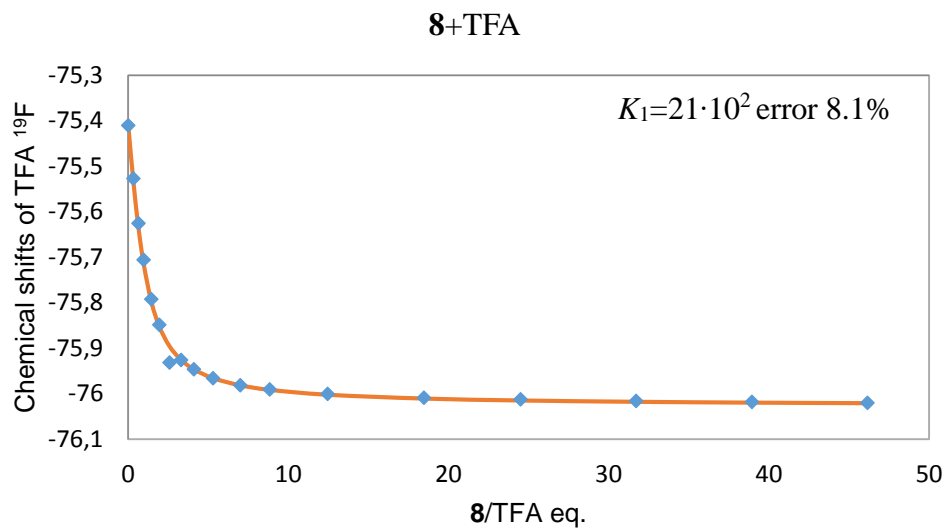

**Figure S17.** Titration data and fitting curves of TFA with urea derivatives **1**, **2**, **6**, **7**, **8**.

## <sup>1</sup>H-NMR titration of (*R,R*)-cycHC[6] **6** with TFA

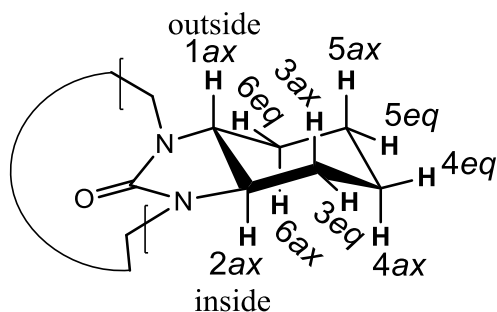

**Figure S18.** <sup>1</sup>H-NMR of titration of (*R,R*)-cycHC[6] **6** with TFA. Identification of <sup>1</sup>H-NMR signals is reported previously<sup>19</sup>. Proton *1ax* at 2.77 ppm shifts upon addition of 16 eq. of TFA to 2.86 ppm. Therefore external binding is proposed as proton *1ax*, which is positioned outside of the cavity. chemical shift value changes and *2ax* at 2.40 ppm, which is positioned inside the cavity, does not change upon addition of TFA.

<sup>1</sup>H-NMR titration data was used only for identification of complexation site and was not used for calculation of association constant because acidity of the media affects chemical shift values and during titration large change in strong acid (TFA) concentration occurs. Also one can follow shift of H<sub>2</sub>O in the spectra and formed H<sub>3</sub>O<sup>+</sup> ion will also influence binding of TFA to urea.

## References

- <sup>1</sup>Fuentes de Arriba, Á. L.; Seisdedos, D. G.; Simón, L.; Alcázar, V.; Raposo, C.; Morán, J. R. *J. Org. Chem.*, **2010**, *75*, 8303-8306.
- <sup>2</sup>Li, Y.; Li, L.; Zhu, Y.; Meng, X.; Wu, A. *Cryst. Growth Des.*, **2009**, *9*(10), 4255–4257.
- <sup>3</sup>Fomitšenko, M.; Peterson, A.; Reile, I.; Cong, H.; Kaabel, S.; Prigorchenko, E.; Järving, I.; Aav, R. *New J. Chem.*, **2017**, *41*, 2490-2497.
- <sup>4</sup>Prigorchenko, E.; Öeren, M.; Kaabel, S.; Fomitšenko, M.; Reile, I.; Järving, I.; Tamm, T.; Topić, F.; Rissanen, K.; Aav, R. *Chem. Commun.*, **2015**, *51*(54), 10921–10924.
- <sup>5</sup>Fomitšenko, M. 'Chromatographic Analysis of Cyclohexano-Substituted Hemicucurbiturils and Characterization of their Intermediates with Mass Spectrometry', PhD thesis, **2017**, Tallinn University of Technology.
- <sup>6</sup>Li, C.; Mella, S. L.; Sartorelli, A. C. *J. Med. Chem.*, **1981**, *24*, 1089-1092.
- <sup>7</sup>Rigaku (2011). *CollectionStrategy*. Rigaku Corporation, Tokyo, Japan.
- <sup>8</sup>CrysAlisPro, **2014**, Agilent Technologies Ltd, Yarnton, Oxfordshire, UK. Version 1.171.36.35
- <sup>9</sup>Clark, R. C.; Reid, J. S. *Acta Cryst.*, **1995**, *A51*, 887-897.
- <sup>10</sup>Sheldrick, G. M. *Acta Cryst.*, **2015**, *A71*, 3-8.

- 
- <sup>11</sup>Dolomanov, O. V.; Bourhis, L.J.; Gildea, R.J.; Howard, J. A. K.; Puschmann, H. J. *Appl. Cryst.*, **2009**, *42*, 339-341.
- <sup>12</sup>Macrae, C. F.; Bruno, I. J.; Chisholm, J. A.; Edgington, P. R.; McCabe, P.; Pidcock, E.; Rodriguez-Monge, L.; Taylor, R.; Streek J.; Wood, P. A. *J. Appl. Cryst.*, **2008**, *41*, 466-470.
- <sup>13</sup>Persistence of VisionPty. Ltd. (2004) Persistence of VisionRaytracer (Version 3.7) [Computersoftware]. Retrieved from <http://www.povray.org/download/>
- <sup>14</sup>Becke, A. D. *Phys. Rev. A*, **1988**, *38*, 3098-3100.
- <sup>15</sup>Perdew, J. P.; Zunger, A. *Phys. Rev. B*, **1981**, *23*, 5048-5079.
- <sup>16</sup>Perdew, J. P. *Phys. Rev. B*, **1986**, *33*, 8822-8824.
- <sup>17</sup>Eichkorn, K.; Treutler, O.; Öhm, H.; Häser M.; Ahlrichs, R. *Chemical Physics Letters*, **1995**, *242*, 652-660.
- <sup>18</sup>TURBOMOLE V6.3 2010, a development of University of Karlsruhe and Forschungszentrum Karlsruhe GmbH, 1989-2007, TURBOMOLE GmbH, since 2007; available from <http://www.turbomole.com>.
- <sup>19</sup>Fomitšenko, M.; Shmatova, E.; Öeren, M.; Järving, I.; Aav, R. *Supramol. Chem.*, **2014**, *26*, 698-703.
